1 Experimental introgression in *Drosophila*: asymmetric postzygotic isolation associated with  
2 chromosomal inversions and an incompatibility locus on the X chromosome

3

4

5 Running title: Experimental introgression in *Drosophila*

6

7 Authors:

8 Poikela N.<sup>1</sup>, Laetsch D. R.<sup>2</sup>, Kankare M.<sup>1</sup>, Hoikkala A.<sup>\*1</sup>, & Lohse K.<sup>\*2</sup>

9 \* Shared last authorship

10 <sup>1</sup>Department of Biological and Environmental Science, University of Jyväskylä, Finland

11 <sup>2</sup>Institute of Evolutionary Biology, University of Edinburgh, United Kingdom

12

13 Corresponding author:

14 Noora Poikela, Department of Biological and Environmental Science, P.O. Box 35, FI-40014 University of  
15 Jyväskylä, Finland

16 E-mail: noora.p.poikela@gmail.com

17 Phone: +358 40 5383527

18

19

20

21

22

23

24

25

26

27

28

29

30

31

32

33

34

35

36

37

38

39

40

41

42

43

44

45

46

47

48

49

50

51 **Abstract**

52 Interspecific gene flow (introgression) is an important source of new genetic variation, but selection  
53 against it can reinforce reproductive barriers between interbreeding species. We used an experimental  
54 approach to trace the role of chromosomal inversions and incompatibility genes in preventing  
55 introgression between two partly sympatric *Drosophila virilis* group species, *D. flavomontana* and *D.*  
56 *montana*. We backcrossed F<sub>1</sub> hybrid females from a cross between *D. flavomontana* female and *D.*  
57 *montana* male with the males of the parental species for two generations and sequenced pools of  
58 parental strains and their reciprocal 2<sup>nd</sup> generation backcross (BC<sub>2</sub>mon and BC<sub>2</sub>fla) females. Contrasting  
59 the observed amount of introgression (mean hybrid index, HI) in BC<sub>2</sub> female pools along the genome to  
60 simulations under different scenarios allowed us to identify chromosomal regions of restricted and  
61 increased introgression. We find no deviation from the HI expected under a neutral null model for any  
62 chromosome for the BC<sub>2</sub>mon pool, suggesting no evidence for genetic incompatibilities in backcrosses  
63 towards *D. montana*. In contrast, the BC<sub>2</sub>fla pool showed high variation in the observed HI between  
64 different chromosomes, and massive reduction of introgression on the X chromosome (large X-effect).  
65 We find that this observation is compatible with reduced recombination combined with at least one  
66 dominant incompatibility locus residing within the X inversion(s). Overall, our study suggests that  
67 genetic incompatibilities arising in chromosomal inversions can play an important role in speciation.

68  
69 **Keywords:** chromosomal inversions, experimental evolution, genetic incompatibilities, hybridization,  
70 introgression, X-effect

71

72

73

74

75

76

77

78

79

80

81

82

83

84

85

86

87

88

## 89 Introduction

90 Interspecific gene flow (introgression) is an important source of genetic variation for adaptation to new  
91 environments (Abbott et al., 2013; Anderson & Hubricht, 1938; Lewontin & Birch, 1966). At the same  
92 time, selection against introgression at certain loci acts to maintain barrier loci and protect species'  
93 integrity from the negative effects of hybridization (Barton & Bengtsson, 1986; Ravinet et al., 2017;  
94 Servedio & Noor, 2003; Wu, 2001). The patterns of genomic divergence and the permeability of species  
95 boundaries in certain genomic regions provides valuable insights into the genomic regions that  
96 contribute to speciation (Harrison & Larson, 2014). However, we still lack a good understanding of how  
97 barrier genes are arrayed within the genome, how effectively and in what generation they restrict  
98 introgression, and what kind of role chromosomal inversions and sex chromosomes play in maintaining  
99 genetic barriers (Butlin, 2005; Coughlan & Matute, 2020; Coyne & Orr, 2004; Faria & Navarro, 2010;  
100 Gompert, Lucas, Nice, & Buerkle, 2012; Nosil & Feder, 2012).

101 Speciation in isolation (allopatry), occurring via drift or indirect effects of selection, can lead to the  
102 “incidental” establishment of intrinsic genetic incompatibilities (Coyne & Orr, 2004; Tang & Presgraves,  
103 2009). These incompatibilities generally involve negative epistatic interactions between two or more  
104 loci, where new alleles arising in one or both of the interacting lineages function well in their own genetic  
105 background, but interact negatively with the alleles of other species in hybrids (Bateson-Dobzhansky-  
106 Muller incompatibilities, BDMIs or DMIs; Coyne & Orr, 2004; Orr, 1995; Presgraves, 2010b). Lack of gene  
107 flow may also increase the fixation probability of meiotic drive loci (loci that manipulate meiotic process  
108 to favour their own transmission) and their suppressor loci within each population and drive the  
109 genomic divergence of these populations (Crespi & Nosil, 2013). Compared to allopatric speciation,  
110 where both BDMIs and neutral differences between species are expected to build up randomly along  
111 the genome, divergence with gene flow leads to clusters of species- or population-specific loci that are  
112 sheltered from recombination (Abbott et al., 2013; Butlin, 2005; Felsenstein, 1981). Accordingly, an  
113 accumulation of BDMIs between species may be drastically different with and without gene flow.  
114 Importantly, in the presence of gene flow BDMIs can only accumulate if they are favoured by selection  
115 (Bank, Bürger, & Hermisson, 2012).

116 Chromosomal inversions are a major factor rearranging the genome and inducing changes in gene  
117 interactions and expression patterns (Hoffmann & Rieseberg, 2008; Kirkpatrick & Barton, 2006;  
118 Sturtevant, 1921; Dobzhansky, 1940). Inversions may gain a fitness advantage and spread through  
119 conspecific populations if they reduce recombination between co-adapted genes (Kirkpatrick & Barton,  
120 2006; Navarro & Barton, 2003). Once inversions have become fixed between species, they can generate  
121 postzygotic isolation in several ways. They can prevent interspecific gene flow directly by inducing  
122 problems in chromosome pairing during meiosis, which can lead to malformed gametes and reduced  
123 hybrid fertility and viability (Coyne & Orr, 2004; Hoffmann & Rieseberg, 2008; Rieseberg, 2001).  
124 However, these problems are partially avoided in *Drosophila*, since malformed gametes remain in the  
125 polar nuclei and do not enter the developing gametes (Hoffmann & Rieseberg, 2008; Sturtevant &  
126 Beadle, 1936). Perhaps more importantly, the limited recombination across inverted regions,  
127 particularly near inversion breakpoints and within overlapping inversions, facilitates the build-up of  
128 BDMIs via divergent selection and/or drift (Fishman, Stathos, Beardsley, Williams, & Hill, 2013; Khadem,  
129 Camacho, & Nóbrega, 2011; Mcgaugh & Noor, 2012; Navarro & Barton, 2003; Noor, Grams, Bertucci, &  
130 Reiland, 2001). Thus, species-specific inversions harbouring BDMIs may act as strong barriers to gene  
131 flow (Hoffmann & Rieseberg, 2008; Noor et al., 2001).

132 The disproportionate involvement of sex chromosomes in reproductive isolation in many systems is  
133 captured by two general observations: Haldane’s rule – the increased  $F_1$  inviability and sterility of the  
134 heterogametic sex compared to the homogametic sex (Haldane, 1922; Orr, 1997; Turelli & Orr, 2000) –  
135 and the large X-effect – the fact that the X chromosome shows a disproportionately large effect on the  
136 sterility and inviability of backcross hybrids (Masly & Presgraves, 2007; Turelli & Orr, 2000). Explanation

137 for both observations often presume recessivity of X-linked alleles, which can lead to more pronounced  
138 effects in hemizygous than in heterozygous hybrids ("Dominance theory"; Coyne & Orr, 2004; Turelli &  
139 Orr, 1995, 2000) and/or rapid evolution of X-linked alleles facilitating BDMLs as a byproduct ("Faster X  
140 evolution"; Charlesworth, Campos, & Jackson, 2018; Charlesworth, Coyne, & Barton, 1987). The X  
141 chromosome has also been suggested to be enriched for genes that create postzygotic isolation in  
142 hybrids compared to autosomes (Coyne, 2018). In particular, meiotic drive loci are more frequent on  
143 the X than on autosomes, and incompatibilities between drivers and their suppressors in hybrids may  
144 generate problems in hybrid development (Courret, Chang, Wei, Montchamp-Moreau, & Larracuente,  
145 2019; Crespi & Nosil, 2013; Crown, Miller, Sekelsky, & Hawley, 2018).

146 Pairwise BDMLs may involve substitutions in both diverging lineages, or derived substitutions in one  
147 lineage and preserved ancestral alleles in another lineage (Barbash, Awadalla, & Tarone, 2004; Cattani  
148 & Presgraves, 2009; Coyne & Orr, 2004). BDMLs can also result from cumulative effects of many small  
149 incompatibilities or from a single incompatibility between two complementary genes, and the  
150 complexity of the incompatibility interaction does not reflect the severity of the barrier (Orr, 1995;  
151 Presgraves, 2010a). Importantly, and in contrast to interactions within a locus where a dominant allele  
152 masks a recessive allele, in epistatic interactions between different loci a dominant allele at one locus  
153 may interact with dominant or recessive alleles at other loci. Epistatic interactions involving dominant  
154 alleles are of special interest in the context of BDMLs but have received less attention than BDMLs  
155 involving recessive alleles.

156 Two closely-related species of the *Drosophila virilis* group, *D. montana* and *D. flavomontana*, provide an  
157 excellent test case for studying the evolution of BDMLs. The species originate from the Rocky Mountains  
158 of North America, where the divergence of the *montana* complex species (*D. flavomontana*, *D. lacicola*  
159 and *D. borealis*) most likely occurred (Hoikkala & Poikela, 2022; Patterson, 1952; Throckmorton, 1982).  
160 *D. montana* has expanded around the northern hemisphere, whereas *D. flavomontana* has remained in  
161 North America (Hoikkala & Poikela, 2022). *D. montana* lives generally in colder environments and uses  
162 different host trees than *D. flavomontana* (Patterson, 1952; Throckmorton, 1982). Reproductive  
163 barriers between *D. montana* females and *D. flavomontana* males are nearly complete, while in the  
164 reciprocal cross strong postzygotic isolation is accompanied by prezygotic barriers of variable strength  
165 (Poikela et al., 2019). Regardless of these barriers, the two species can be crossed to obtain backcross  
166 progenies in both parental directions (Poikela et al., 2019), and interspecific hybrids have reportedly  
167 been found in nature (Patterson, 1952; Throckmorton, 1982). Our recent demographic modelling shows  
168 that the species have diverged ~3 Mya, with low levels of postdivergence gene flow from *D. montana*  
169 to *D. flavomontana* (Poikela et al., in prep.). Moreover, we found in these species several alternatively  
170 fixed inversions, which were already present in their common ancestor, and which may have  
171 contributed to the build-up and maintenance of adaptive traits and reproductive barriers by restricting  
172 gene flow between the evolving lineages (Poikela et al., in prep.).

173 The goal of this study was to determine which genomic regions are likely to accommodate dominant  
174 BDMLs in hybrids between *D. montana* and *D. flavomontana*, paying special attention to fixed inversions  
175 and the X chromosome. We investigated BDMLs between these species experimentally by sequencing  
176 pools of *D. montana* females from an allopatric population and *D. flavomontana* females from a  
177 (presently) parapatric population, as well as pools of 2<sup>nd</sup> backcross generation (BC<sub>2</sub>) females in both  
178 directions (Fig. 1). We identified chromosomal regions with decreased and increased introgression by  
179 quantifying the amount of introgressed genetic material (mean hybrid index, HI) along the genome in  
180 both backcross pools. We then compared the observed HI to the distribution of chromosome-wide HI  
181 in *in silico* replicates of this "introgress-and-resequence" experiment under contrasting assumptions  
182 about the presence and location of BDMLs. Since this experimental design involved only backcross  
183 females, only BDMLs involving a dominant allele could affect allele frequencies in the pool while  
184 recessive-recessive BDMLs were masked (Table 1). Our main questions were:

- 185 (i) Does the strength and genomic distribution of genetic incompatibilities between *D.*  
186 *montana* and *D. flavomontana* differ between the reciprocal crosses?  
187 (ii) Do the species show increased genetic divergence and decreased introgression within  
188 chromosomal inversions, and could this be caused by inversions' propensity to suppress  
189 recombination and harbour genetic incompatibilities?  
190 (iii) Does the X chromosome show less introgression than autosomes (large X-effect)? And if  
191 yes, why?

## 192 2 Materials and methods

### 193 2.1 Fly material

194 We collected fertilised *D. montana* females from Seward, Alaska, USA (60°09'N; 149°27'W) and *D.*  
195 *flavomontana* females from Livingston, Montana, USA (45°20'N; 110°36'W) in 2013. The distance  
196 between the sites is ~3000 km. Alaskan *D. montana* can be regarded as an allopatric population, as *D.*  
197 *flavomontana* has not been found above 54°N (Poikela et al., 2019). In contrast, the *D. flavomontana*  
198 population from Montana can be regarded as a parapatric, as the two species are known to coexist in  
199 the Rocky Mountains, even though we found only *D. flavomontana* on the collecting site (Poikela et al.,  
200 2019).

201 Progenies of wild-caught *D. montana* and *D. flavomontana* females were used to establish isofemale  
202 strains, which were maintained in continuous light and 19 °C for about 23 generations (~3 years) in the  
203 University of Jyväskylä (Finland) prior to their use in the present study. We performed the crossing  
204 experiment using flies of *D. montana* strain SE13F37 and *D. flavomontana* strain MT13F11. For the  
205 crosses, the flies were sexed under light CO<sub>2</sub> anaesthesia within three days after emergence, when they  
206 were still virgins. Males and females were transferred into fresh malt-vials once a week and used in the  
207 crossing experiments at age 20 ± 2 days when they were sexually mature (Salminen & Hoikkala, 2013).

### 208 2.2 Crossing experiment

209 We started the crossing experiment by performing a single-pair cross between *D. flavomontana* female  
210 and *D. montana* male, as reciprocal cross is not successful. Our crossing design (outlined in Fig. 1) only  
211 involved hybrid females because F<sub>1</sub> males are largely sterile (Päällysaho, Aspi, Liimatainen, & Hoikkala,  
212 2003; Poikela et al., 2019), and because *Drosophila* males lack recombination (crossing-over) in meiosis  
213 The initial cross produced seven F<sub>1</sub> females, which were backcrossed towards both parental species:  
214 four were mated to *D. montana* males and three to *D. flavomontana* males. The 1<sup>st</sup> backcross generation  
215 females (BC<sub>1</sub>mon and BC<sub>1</sub>fla females) were backcrossed to the same paternal species as in the previous  
216 generation to obtain BC<sub>2</sub>mon and BC<sub>2</sub>fla females (82 females in both directions). BC<sub>2</sub> females were  
217 collected within three days after their emergence and stored in -20 °C for DNA extractions.

### 218 2.3 Fertility of BC<sub>1</sub> females

219 We defined the fertility of BC<sub>1</sub> females (BC<sub>1</sub>mon and BC<sub>1</sub>fla females) by checking whether they produced  
220 progeny after mating with a *D. montana* or *D. flavomontana* male (Fig. 1). BC<sub>1</sub> females that produced  
221 no progeny were considered sterile. We used a one-sample Student's t-test (*t-test* function) to test  
222 whether the BC<sub>1</sub> females from the reciprocal crosses showed reduced fertility, when the expected  
223 fertility is 1. We also compared the fertility of BC<sub>1</sub> females between the reciprocal crosses to define  
224 possible asymmetries (BC<sub>1</sub>mon vs. BC<sub>1</sub>fla), using a generalised linear model (GLM) with Binomial  
225 distribution (1=fertile, 0=sterile) (*glm* function). All analyses were conducted in base R v1.2.1335-1 and  
226 R studio v3.6.1.

### 227 2.4 Pool-sequencing, mapping, and variant calling

228 We made DNA extractions from four pools, one pool of each parental strain (*D. montana* SE13F37 and  
229 *D. flavomontana* MT13F11) and pools for the two 2<sup>nd</sup> generation backcrosses (BC<sub>2</sub>mon and BC<sub>2</sub>fla). Each

230 pool consisted of 82 females. We used cetyltrimethylammonium bromide (CTAB) solution with RNase  
231 treatment, Phenol-Chloroform-Isoamyl alcohol (25:24:1) and Chloroform-Isoamyl alcohol (24:1)  
232 washing steps and ethanol precipitation. Nextera library preparation and 150 bp Illumina paired-end  
233 sequencing were performed at Edinburgh Genomics, UK. Illumina paired-end reads of all four samples  
234 were quality-checked with FastQC v0.11.8 (Andrews 2010) and trimmed for adapter contamination and  
235 low-quality bases using fastp v0.20.0 (Chen, Zhou, Chen, & Gu, 2018). After filtering, the total number  
236 of reads per pool varied from 152 to 174 million, and the mean length and insert size peak being 141-  
237 143bp and 150bp, respectively (Table S1). The mean coverage of the pools varied from 170 to 220 (Table  
238 S1).

239 All analyses were based on reads mapped to a *D. montana* chromosome-level genome assembly with  
240 full gene annotation (Poikela et al. in prep.). Filtered Illumina reads of each sample were mapped to the  
241 unmasked reference genome using BWA mem (Burrows-Wheeler Aligner) v0.7.17 with read group  
242 information (Li & Durbin, 2009). The alignments were sorted with SAMtools v1.10 (Li et al., 2009) and  
243 PCR duplicates marked with sambamba v0.7.0 (Tarasov, Vilella, Cuppen, Nijman, & Prins, 2015). The  
244 obtained BAM-files were used for variant calling with the softmasked version of the reference genome  
245 using freebayes parallel v1.3.1-dirty (Garrison & Marth, 2012) with --no-population-priors --hwe-priors-  
246 off --use-mapping-quality --ploidy 2 --theta 0.02 --haplotype-length -1).

247 Variant calling detected a total of 8,876,483 variants. To normalise the representation of variants, the  
248 resulting VCF-file was processed with vt normalize (Tan, Abecasis, & Kang, 2015). The variants were  
249 filtered for quality and SNPs (single nucleotide polymorphism) using bcftools filter and view v1.9 (Li,  
250 2011). We chose only biallelic SNPs with a minimum depth of 80 to reliably calculate allele frequencies  
251 and to minimize potential reference bias. These quality filtering steps resulted in a total of 5,047,746  
252 SNPs.

## 253 2.5 Inversion breakpoints

254 The breakpoints of alternatively fixed inversions of *D. montana* and *D. flavomontana* on the X  
255 chromosome and chromosomes 2L, 4 and 5 were obtained from Poikela et al. (in prep.). The presence  
256 of the inversions in Illumina samples of parental pools was verified by passing the respective BAM-files  
257 to Delly v0.8.1 (Rausch et al., 2012), which identifies structural variants based on paired-end read  
258 orientation and split-read evidence. The inversion breakpoints were also confirmed visually by checking  
259 the orientation and insert size around each breakpoint in the Interactive Genomics Viewer  
260 (Thorvaldsdóttir, Robinson, & Mesirov, 2012) (Example plot shown in Fig. S1). Inversion breakpoints are  
261 shown in Fig. 3, Fig. 4 and Table S2.

## 262 2.6 Genetic differentiation, hybrid index and the types of genetic incompatibilities

263 The expected amount of genetic material transferred from one species into the other (hybrid index, HI)  
264 halves with every backcross generation (Fig. 1). Thus, in the pool of 2<sup>nd</sup> backcross generation hybrid  
265 females, the genome-wide HI is expected to be 12.5% in the absence of BDMIs (Fig. 1). However, given  
266 the random inheritance of chromatids in gametes and the randomness of cross-over locations, we  
267 expect substantial variation around the expected mean HI, even in the absence of BDMIs.

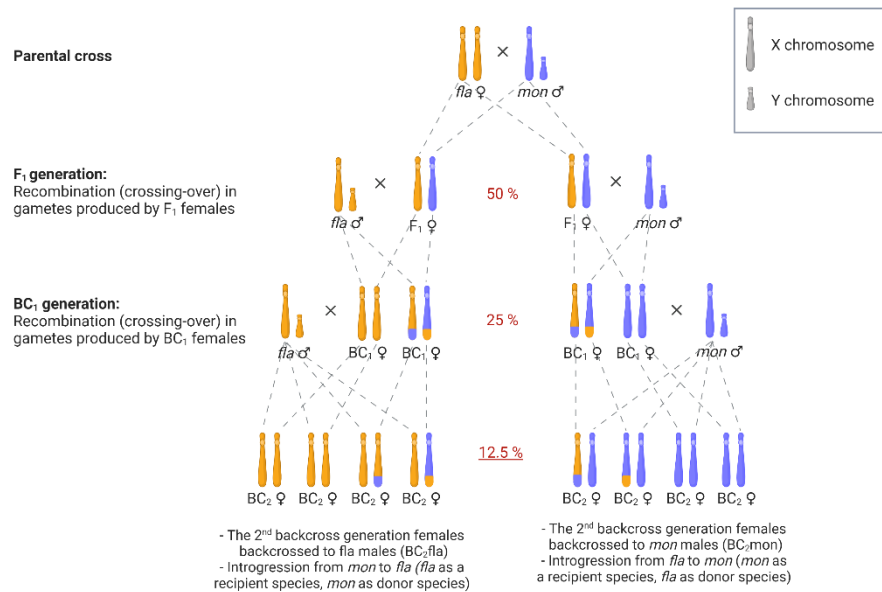

268

269 Figure 1. Illustration of the crossing experiment showing the inheritance of sex chromosomes (inheritance of  
 270 autosomes is similar to that of female X chromosomes). F<sub>1</sub> females, produced in a single-pair cross between *D.*  
 271 *flavomontana* (*fla*) female and *D. montana* (*mon*) male, were backcrossed to either *D. flavomontana* or *D.*  
 272 *montana* male. In the next generation, each BC<sub>1</sub> female was mated with a male of its paternal species. In every  
 273 generation, the expected amount of genetic material that is transferred from the gene pool of one species into  
 274 the gene pool of another one (introgression) is halved (red percentages). Thus, under a null neutral model, we  
 275 expect a mean HI of 12.5 % for the BC<sub>2</sub> pools that were sequenced. Note that recombination occurring in the  
 276 gametes produced by F<sub>1</sub> and BC<sub>1</sub> females creates variation in the expected amount of HI. For simplicity, the figure  
 277 shows products of only one cross-over event that has occurred in each backcross direction.

278 To estimate the amount of introgression in the BC<sub>2</sub> pools, we computed the HI in both pools along the  
 279 genome based on species-diagnostic SNPs (variants that are differentially fixed between the parental  
 280 pools). Allele frequencies for each SNP in all four pools were calculated by dividing “Alternate allele  
 281 observation count (AO)” by “the total read depth (DP)” (relative to *D. montana* reference genome).  
 282 Diagnostic variants were defined as SNPs with allele frequency 1 in one parental pool and 0 in the other  
 283 one (1 = all reads supporting the alternate allele, 0 = all reads supporting the reference allele). The total  
 284 number of SNPs that were differentially fixed between the parental species was 1,109,701.

285 We compared collinear and inverted parts of each chromosome in terms of the density of diagnostic  
 286 SNPs. Each chromosome was divided into 200kb non-overlapping windows (55-147 windows per  
 287 chromosome depending on the chromosome length), and the number of diagnostic SNPs in each  
 288 window was counted using a custom script  
 289 ([https://github.com/vihoikka/SNP\\_mapper/blob/main/snp\\_binner.py](https://github.com/vihoikka/SNP_mapper/blob/main/snp_binner.py)). The data was analysed using a  
 290 generalised linear model (*glm* function) with a Poisson distribution, where the number of window-wise  
 291 SNPs was used as a response variable, and different chromosomes and different chromosomal partitions  
 292 (collinear, inverted) as explanatory variables. The analyses were performed in base R using R v1.2.1335-  
 293 1 and R studio v3.6.1.

294 Using the diagnostic SNPs, we calculated the mean hybrid index (HI) separately for different  
 295 chromosomes for BC<sub>2</sub>*fla* and BC<sub>2</sub>*mon* pools. We also estimated the fraction of sequence without any  
 296 introgressed material (HI = 0%) separately for each chromosome for both pools. Finally, we plotted HI  
 297 in non-overlapping windows of 400 SNPs for each chromosome and BC<sub>2</sub> pool using a custom script  
 298 ([https://github.com/vihoikka/SNP\\_mapper/blob/main/datasmoother.py](https://github.com/vihoikka/SNP_mapper/blob/main/datasmoother.py)). In principle, recombination  
 299 breakpoints involving the two ancestral backgrounds (Fisher junctions; Fisher, 1954) should be visible

300 as step changes in the HI of each pool. Assuming on average one cross-over per chromosome and female  
301 meiosis, the expected number of recombination breakpoints per chromosome generated during the  
302 experiment is given by the total number of females ( $n_{BC_1} + n_{BC_2}$ ; Table S3) contributing to each pool  
303 (96 and 104 for  $BC_2$ mon and  $BC_2$ fla pools, respectively). Note that the number of junctions between *D.*  
304 *montana* and *D. flavomontana* ancestral material is lower since not all cross-over events in  $BC_1$  females  
305 are junctions. In practice, however, the resolution especially for breakpoints that are unique to a single  
306  $BC_2$  individual (which correspond to a change in allele frequency of  $1/82$ ) is limited by the randomness  
307 in sequencing coverage of the pool.

308 Given that this experiment was started with a single-pair cross between the parental species and  
309 continued with repeated backcrosses between hybrid females and parental males, all backcross  
310 individuals inherited a maximum of one allele per locus from the donor species (Fig. 1.). Thus, the  
311 genomes of BC individuals are a mosaic of two types of tracts: i) homozygous for the genetic background  
312 of the recipient species or ii) heterozygous between species. This limits the types of BDMs that can be  
313 expressed (Table 1). Dominant-dominant pairwise BDMs arise already in the  $F_1$  generation and, if  
314 severe, can cause sterility/inviability in both sexes. Recessive-recessive pairwise BDMs are not possible  
315 in our experiment even if they were X-linked since i) all BC individuals involved in the experiment were  
316 females (no hemizyosity), and ii) the expression of these incompatibilities would require homozygous  
317 tracts for both species (Fig. 1). Hence, dominant-recessive BDMs are the only strong postzygotic  
318 barriers that we expect to detect in this study.

319 Table 1. BDM model for incompatibilities (see Coyne & Orr, 2004). Here gene  $A_1$  of one species interacts negatively  
320 with gene  $B_2$  of another species. Underscore represents any allele, and it does not change the outcome. Note that  
321 dominance refers to an allele's effect on fitness on a hybrid genetic background, and it does not necessarily assume  
322 dominance of alleles on their normal background within species.

---

**dominant-dominant incompatibility (both loci act dominantly):**

$A_1\_B_2\_$  hybrids are affected in the  $F_1$  generation

---

**recessive-recessive incompatibility (both loci act recessively):**

$A_1A_1B_2B_2$  hybrids are affected in the  $F_2$  generation

---

**dominant-recessive incompatibility ( $A_1$  acts dominantly,  $B_2$  recessively):**

$A_1\_B_2B_2$  hybrids are affected in backcross generations

---

## 323 2.7 Simulating the backcross and re-sequence experiment

324 Given the stochastic nature of inheritance of chromatids in gametes and the randomness of cross-over  
325 locations in meiosis, we expected substantial variation in the HI around the expectation of 12.5% (Fig.  
326 1). To evaluate whether the observed mean HI of each chromosome deviates significantly from that  
327 expected under simple models of introgression with or without inversions and/or extreme BDMs, we  
328 simulated the crossing experiment under three different scenarios using Mathematica (Wolfram  
329 Research, Inc., version 11.02 Champaign, IL). All simulations were conditioned on the number of  $BC_2$   
330 females each  $BC_1$  female contributes to the pool (Table S3). We also assumed one cross-over per female  
331 per chromosome in meiosis (a map length of 50cM). Given that the experiment involves two generations  
332 of crosses between hybrid females and pure parental males, our simulation only tracks the haplotype  
333 of female gametes contributing to  $BC_1$  and  $BC_2$  individuals. All *in silico* backcross experiments were  
334 simulated, separately for each chromosome, 10,000 times to obtain 5% and 95% quantiles for the mean  
335 HI.

336 First, we simulated the experiment under a simple null model of neutral introgression, i.e. assuming no  
337 BDMs and no cross-over suppression due to inversions (SIM1, Fig. 2A). Second, we simulated the



338 experiment similarly under neutrality, but including the breakpoint locations of inversions that are  
339 alternately fixed between *D. montana* and *D. flavomontana*. This was done simply by disallowing cross-  
340 over events within inverted regions (inversions breakpoints in Table S2), i.e. we did not attempt to  
341 include interchromosomal effects (SIM2, Fig. 2B). Third, we simulated the experiment under a model  
342 that assumes a single BDMI at a random position within the inverted part of the chromosome (SIM3,  
343 Fig. 2C). This single locus cannot be introgressed beyond the  $F_1$  generation, i.e.  $BC_1$  and  $BC_2$  females that  
344 are heterozygous for this locus are not produced. Note that while we refer to this as a BDMI for  
345 simplicity, we did not explicitly simulate pairwise incompatibilities. Thus, this locus can be regarded as  
346 a BDMI involving a dominant allele on the introgressing background (donor species) that is incompatible  
347 with one or more recessive alleles in the recipient background.

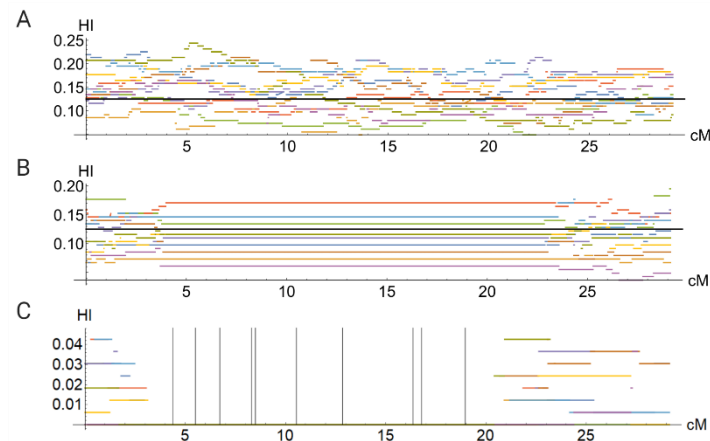

348

349 Figure 2. Introgression experiment was simulated under different scenarios. Example plots of simulated hybrid  
350 indices (HI) (A) under neutrality, (B) in the presence of neutral inversions, and (C) in the presence of inversions  
351 with a single dominant BDMI. For simplicity, here simulations were run 10 times.

### 352 3 Results

#### 353 3.1 $BC_1$ females from the backcrosses towards *D. flavomontana* showed stronger genetic 354 incompatibilities / postzygotic isolation than the ones from the backcrosses towards *D. montana*

355 The proportion of fertile females in the  $BC_1$  generation was 75% and 42% for the  $BC_1$ mon and  $BC_1$ fla  
356 hybrids, respectively, and significantly reduced in both reciprocal crosses when comparing to the  
357 expected fertility of 1 ( $BC_1$ mon:  $t_{19} = -2.52$ ,  $P = 0.021$ ;  $BC_1$ fla:  $t_{54} = -8.67$ ,  $P = 8.371e^{-12}$ ). Furthermore, the  
358 proportion of fertile  $BC_1$ mon females (75%) was significantly higher than that of  $BC_1$ fla females (42%)  
359 (GLM,  $z_{1,73} = -2.45$ ,  $P = 0.015$ ; Fig. S2). These findings show that while both crosses suffer from BDMIs  
360 affecting female fertility, these incompatibilities are more pronounced in backcrosses towards *D.*  
361 *flavomontana* than towards *D. montana* (asymmetric postzygotic isolation, or unidirectional  
362 incompatibilities in the sense of Turelli & Moyle, 2007).

#### 363 3.2 Genetic divergence between *D. montana* and *D. flavomontana* has accumulated within inverted 364 chromosome regions especially on the X chromosome

365 The density of SNPs (SNPs divided into equal-sized bins) that were differentially fixed between *D.*  
366 *montana* and *D. flavomontana* parental pools was higher on the X chromosome than on any of the  
367 autosomes ( $P < 0.001$ ; Fig. 3; Table S4). For each chromosome containing inversions, the density of fixed  
368 differences was higher in inverted than in collinear regions of the genome ( $P < 0.001$ ; Fig. 3; Table S5),  
369 as expected due to the reduction in recombination within inverted regions (note that chromosomes 2R  
370 and 3 have no inversions).

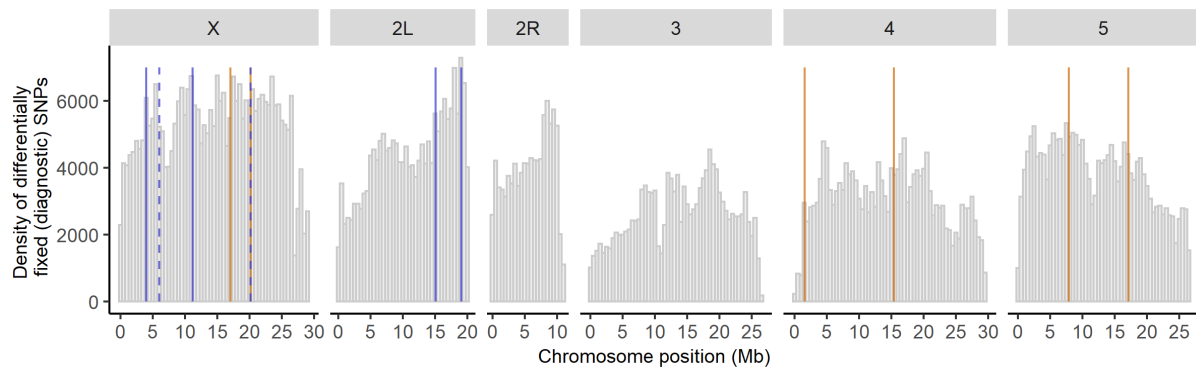

371

372 Figure 3. Density of differentially fixed SNPs (in 200kb windows) between parental species across each  
373 chromosome. Orange and blue vertical lines represent species-specific *D. flavomontana* and *D. montana*  
374 chromosomal inversions, respectively. Solid and dashed vertical lines describe breakpoints of different inversions.  
375 Chromosome 2 involves left (2L) and right (2R) arms separated by a submetacentric centromere.

### 376 3.3 Large differences in HI between chromosomes – evidence for BDMIs located within X chromosomal 377 inversions

378 The mean amount of introgression (hybrid index, HI) of hybrids backcrossed to *D. montana* (BC<sub>2</sub>mon)  
379 did not deviate significantly from the neutral expectation of 12.5% for any chromosome (SIM1) (Fig. 4A;  
380 Fig. 5). Moreover, the number of SNPs that showed no introgression was low, 0.03-0.22%, across the  
381 entire genome (Table S6).

382 In contrast, BC<sub>2</sub>f<sub>1</sub>a hybrids showed a significant deviation in mean HI from the neutral scenario (SIM1)  
383 for all chromosomes, except chromosome arms 2L and 2R (Fig. 4; Fig. 5B; Table S6). The mean HI was  
384 significantly decreased on the X and 4<sup>th</sup> chromosome and significantly increased on the 3<sup>rd</sup> and 5<sup>th</sup>  
385 chromosome compared to the neutral expectation (SIM1) (Fig. 4B; Fig. 5; Table S6). Interestingly, the  
386 reduced introgression on the 4<sup>th</sup> chromosome and the increased introgression on the 5<sup>th</sup> chromosome  
387 could be explained by the reduction in cross-over due to inversions present on these chromosomes,  
388 without invoking any selection acting on incompatibilities (SIM2) (Fig. 4, 5E, 5F). Under this scenario,  
389 the mean HI showed no deviation from the expectation of 12.5% under neutrality but had an increased  
390 variance across simulation replicates (Fig. 5E, 5F). Also, the number of SNPs that showed no  
391 introgression varied from 0.12% to 1.22% for chromosomes 2L, 2R, 4 and 5 (Table S6).

392 The observed decrease in the mean HI of BC<sub>2</sub>f<sub>1</sub>a hybrids on the X chromosome could not be explained  
393 solely by a reduction in cross-over rate due to inversions (Table S6, Fig. 4, 5C). Instead, our simulations  
394 show that the drastic reduction in mean HI on the X chromosome is compatible with a single dominant  
395 incompatibility locus residing within the X inversions (SIM3) (Fig. 4, 5G). In other words, the data are  
396 consistent with a dominant X chromosomal *D. montana* allele that interacts negatively with autosomal  
397 homozygous recessive *D. flavomontana* alleles. Intriguingly, 30 % of the differentially fixed SNPs  
398 between the species on the X chromosome showed no introgression, emphasising the strength of the  
399 X-effect (Table S6).

400 Finally, we conclude that the increase in mean HI observed in BC<sub>2</sub>f<sub>1</sub>a hybrids on the 3<sup>rd</sup> chromosome  
401 cannot be explained by any of the simple scenarios we simulated. Given that we either assumed  
402 neutrality or a single dominant incompatibility locus, which is maximally deleterious in the BC<sub>1</sub> and BC<sub>2</sub>  
403 females, this is not surprising. The number of SNPs showing no introgression was only 0.18% for the 3<sup>rd</sup>  
404 chromosome.

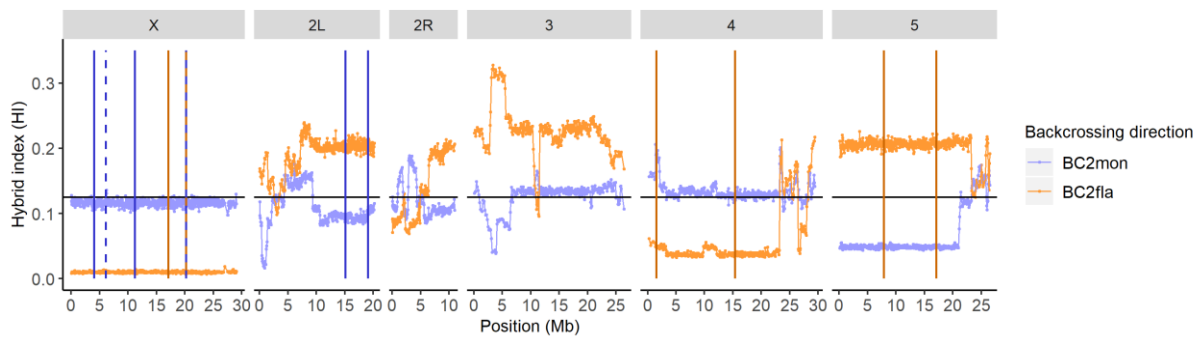

405

406 Figure 4. Observed hybrid index (HI) of 2<sup>nd</sup> backcross generation female pools towards *D. montana* (BC<sub>2</sub>mon) and  
 407 *D. flavomontana* (BC<sub>2</sub>fla) in windows of 400 non-overlapping SNPs along the genome. For chromosome 2 the left  
 408 (2L) and right (2R) arms are separated by a metacentric centromere. The black horizontal line represents the  
 409 expected amount of introgression, HI = 12.5 %, under neutrality. Vertical lines represent species-specific *D.*  
 410 *flavomontana* (yellow) and *D. montana* (blue) chromosomal inversions. Solid and dashed vertical lines show  
 411 breakpoints of different inversions.

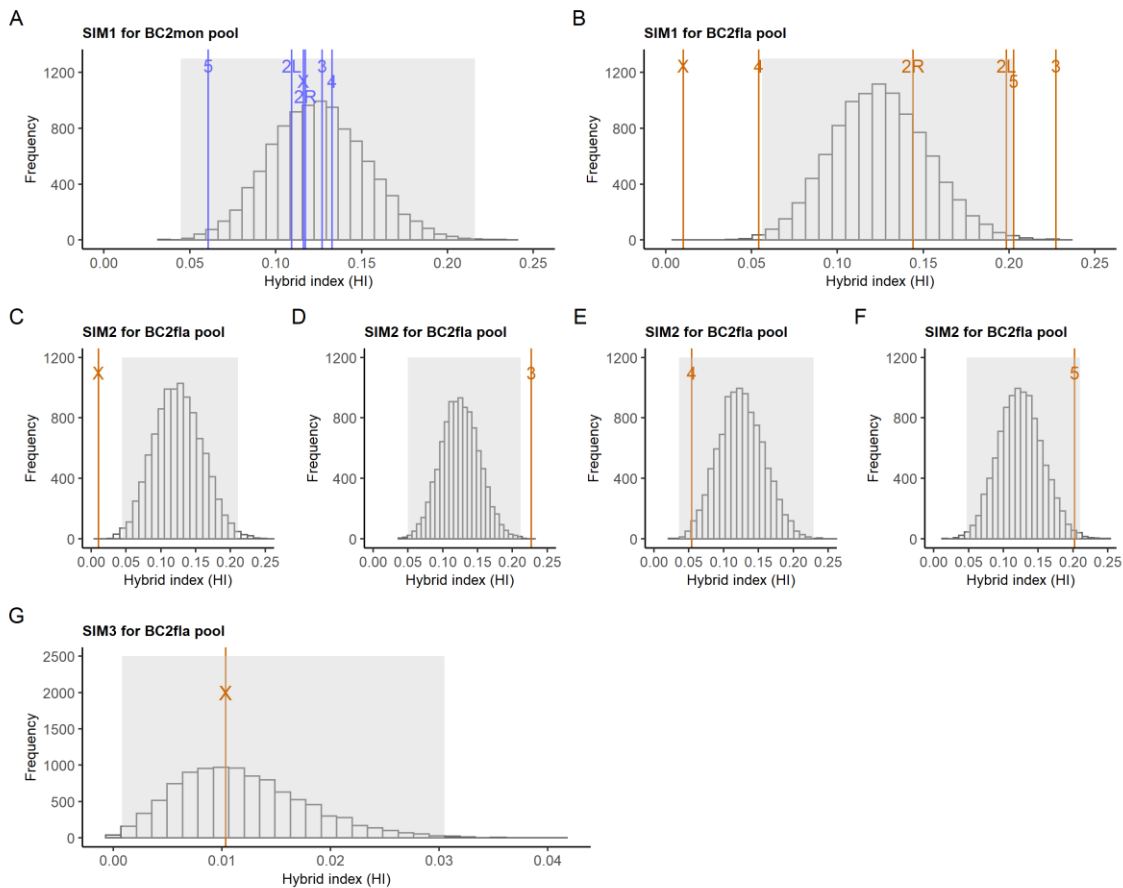

412

413 Figure 5. Hierarchical representation of the most meaningful simulations (10,000 replicates/simulation) of the 2<sup>nd</sup>  
 414 generation backcross experiments towards *D. montana* (BC<sub>2</sub>mon) and *D. flavomontana* (BC<sub>2</sub>fla). The grey area of  
 415 each figure represents Bonferroni corrected 5% and 95% quantiles and the space between them (regions beyond  
 416 the area are statistically significant). Simulations under neutrality (SIM1) and the observed mean hybrid index (HI)  
 417 of each chromosome for (A) BC<sub>2</sub>mon pool and (B) BC<sub>2</sub>fla pool. Simulations under neutral inversions (SIM2) and  
 418 observed mean HI of BC<sub>2</sub>fla pool for (C) the X chromosome, (D) chromosome 3, (E) chromosome 4, and (F)

419 chromosome 5. (G) Simulations involving inversions with a single locus against introgression (SIM3) and observed  
420 mean HI for the X chromosome of BC<sub>2</sub>fla pool.

421

## 422 **4 Discussion**

423 A major theme in speciation research is to understand how the loci inducing genetic incompatibilities  
424 (BDMIs) in interspecific crosses are distributed across the genome, what role chromosomal inversions  
425 and the X chromosome may play in their distribution and what types of epistatic interactions matter for  
426 BDMIs (reviewed in (Coughlan & Matute, 2020; Coyne, 2018; Faria, Johannesson, Butlin, & Westram,  
427 2018; Hoffmann & Rieseberg, 2008)). To shed light on these questions, we performed reciprocal  
428 backcrosses between *D. montana* and *D. flavomontana* and traced the regions of reduced introgression  
429 in 2<sup>nd</sup> backcross generation (BC<sub>2</sub>) females.

### 430 **4.1 Postzygotic barriers between *D. montana* and *D. flavomontana* show asymmetry in their strength**

431 We have previously shown that pre- and postzygotic barriers between *D. montana* females and *D.*  
432 *flavomontana* males are practically complete, while both types of barriers between *D. flavomontana*  
433 females and *D. montana* males are weaker (Poikela et al., 2019). In crosses between *D. flavomontana*  
434 females and *D. montana* males, F<sub>1</sub> hybrid males are sterile, but roughly half of the F<sub>1</sub> females are fertile  
435 (Poikela et al., 2019). Accordingly, here we backcrossed fertile F<sub>1</sub> females with males of both parental  
436 species, and observed a clear asymmetry in the strength of postzygotic barriers between the two  
437 backcross directions. BC<sub>1</sub> hybrid females born from the backcrosses between F<sub>1</sub> females and *D. montana*  
438 males showed rather high fertility, and the genetic incompatibilities observed in BC<sub>2</sub> females had no  
439 detectable effect. In contrast, when backcrossing F<sub>1</sub> hybrid females with *D. flavomontana* males, more  
440 half of the BC<sub>1</sub> females were sterile, and BC<sub>2</sub> females showed signs of strong BDMIs. This asymmetry  
441 could be a consequence of a history of unidirectional introgression from *D. montana* into *D.*  
442 *flavomontana* in nature (Poikela et al., in prep.), if it had induced selection against introgression at  
443 certain loci especially within the X chromosomal inversions, but homogenised genetic divergence on  
444 collinear regions. This kind of pattern in the permeability of species boundaries have been found to  
445 contribute to speciation also in other species (Harrison & Larson, 2014).

446 It is surprising that introgression has not occurred from *D. flavomontana* to *D. montana* in nature, given  
447 that backcrossing towards *D. montana* (BC<sub>2</sub>mon) was relatively successful in this study. The most  
448 obvious reason for this discrepancy is that laboratory experiments may not reveal all reproductive  
449 barriers relevant in wild populations. For example, hybrids may have problems in mate choice in the  
450 wild, or they may face challenges to feed or reproduce on species-specific host trees. Moreover, also  
451 the male hybrids regain fertility in backcross generations (data not shown), which may contribute to  
452 introgression in nature. Finally, in this study we used a *D. montana* population that is allopatric to *D.*  
453 *flavomontana*, while BDMIs may well be stronger between *D. montana* and *D. flavomontana*  
454 populations living in close contact.

### 455 **4.2 The role of inversions and the X chromosome in reducing recombination and introgression from *D.*** 456 ***montana* to *D. flavomontana* (BC<sub>2</sub>fla pool)**

457 Inversions have suggested to contribute to speciation, if three criteria are met: closely related species  
458 must carry alternatively fixed inversions, the inversions must suppress recombination, and this  
459 suppression of recombination facilitates reproductive isolation (Faria & Navarro, 2010). We have  
460 recently identified several alternatively fixed inversions in *D. montana* and *D. flavomontana*, and shown  
461 that these inversions have increased genetic divergence and lower historical introgression compared to  
462 colinear chromosome regions (Poikela et al., in prep.). In the present study, we show that these  
463 inversions have an increased number of alternatively fixed SNPs compared to colinear regions, which is  
464 in agreement with their increased genetic divergence shown in Poikela et al. (in prep.). We also show  
465 that inversions effectively suppress recombination in hybrid individuals across a large swathe of the

466 genome (Fig. 4). Finally, we find that the drastic reduction in introgression on the X chromosome can be  
467 explained by inversions that are associated with at least one dominant X chromosomal *D. montana*  
468 incompatibility allele interacting negatively with recessive autosomal *D. flavomontana* alleles. This  
469 negative epistatic interaction could cause the observed low hybrid fertility, and supports the idea that  
470 inversions act as strong barriers to gene flow by facilitating the establishment of BDMLs (Hoffmann &  
471 Rieseberg, 2008; Navarro & Barton, 2003; Noor et al., 2001).

472 While the involvement of the X chromosome in hybrid problems may not be surprising (see e.g. Masly  
473 & Presgraves, 2007; Tao, Chen, Hartl, & Laurie, 2003), the fact that it involves a dominant incompatibility  
474 locus is. The “dominance theory” (e.g. Turelli & Orr, 1995, 2000), which aims to explain the  
475 disproportionate role of the X chromosome in hybrid incompatibilities, relies on the presence of  
476 recessive incompatibilities on the X and therefore cannot explain our result. However, the “dominance  
477 theory”, as well as the “faster-male theory” and dosage compensation (reviewed in Coyne, 2018;  
478 Presgraves, 2008), can still explain the hybrid male sterility previously observed in crosses between *D.*  
479 *flavomontana* and *D. montana* (Poikela et al., 2019). Accumulation of meiotic drive elements on the X  
480 chromosome could be another plausible explanation for the large X-effect in general (reviewed in  
481 Patten, 2018), but is unlikely in our system for two reasons. First, meiotic drivers should increase their  
482 own transmission in both backcross directions, leading to decreased introgression in the BC<sub>2</sub>fla pool and  
483 increased introgression in the BC<sub>2</sub>mon pool, which we did not see. Second, meiotic drive systems  
484 described in *Drosophila* are typically involved in sperm killing and not in female sterility (Courret et al.,  
485 2019). Although cytoplasmic incompatibilities have been detected in other *montana* complex species  
486 of the *Drosophila virilis* group (Patterson, 1952; Throckmorton, 1982), they are not likely to play a major  
487 role in these crosses since all hybrids had *D. flavomontana* cytoplasm (and crosses were more  
488 unsuccessful in this direction). Finally, the large effect of the X we find could potentially be explained by  
489 “faster X evolution”, based on the idea that selection increases the frequency of advantageous recessive  
490 alleles more effectively on the X chromosome than on autosomes, irrespectively of whether the  
491 incompatibilities themselves are recessive (Charlesworth et al. 1987, 2018). Also, the X chromosome  
492 could simply contain more genes that are prone to create postzygotic isolation than those on the  
493 autosomes (Coyne, 2018).

494 Several autosomes showed deviations from the expected hybrid indices in the BC<sub>2</sub>fla pool in the present  
495 study. Based on our simulations, the reduced and increased introgression on the 4<sup>th</sup> and 5<sup>th</sup>  
496 chromosomes, respectively, could be explained by inversions’ ability to restrict recombination which  
497 increases the variance in chromosome-wide HI. However, if we calculate the expected allele frequencies  
498 for a dominant–recessive BDML by hand for the first two backcross generations, the allele frequencies  
499 (i.e. HI) after selection would be 1/22 (4.5%) for the dominant and 2/11 (18.2%) for the recessive *D.*  
500 *montana* allele in the BC<sub>2</sub>fla pool (see Fig. S2). These frequencies are close to the observed frequencies  
501 on chromosomes 4 (5.4%) and 2L (19.8%), respectively. It is therefore tempting to speculate that a  
502 pairwise BDML loci exist on these chromosomes. Finally, the 3<sup>rd</sup> chromosome, which lacks species-  
503 specific inversions, showed a drastic increase in introgression, and was not explained by any of our  
504 simulations. We note that our simulations did not consider an interchromosomal effect, where  
505 inversions may trigger an increase in recombination on other freely recombining chromosomes (Crown  
506 et al., 2018; Stevison, Hoehn, & Noor, 2011). However, this would only decrease the variance in HI on  
507 chromosomes lacking fixed inversions and so cannot explain the increase in HI for chromosome 3 in the  
508 BC<sub>2</sub>fla pool.

509 In future research, combing the crosses with quantitative trait loci (QTL) analyses might help to link  
510 BDMLs to e.g. specific genes (Johnson, 2010) or gene duplicates or transpositions (Bikard et al., 2009;  
511 Masly, Jones, Noor, Locke, & Orr, 2006). BDML genes could also be searched by tracing the expression-  
512 phenotypes in interspecific hybrids in these genes (Landry et al., 2005). However, recombination  
513 suppression of inversions presents a challenge for mapping BDMLs, and would potentially require a

514 complex reversion of the X chromosomal inversions with genome editing tools, and repeating the  
515 current experiment to narrow down the regions of reduced introgression (Hopkins, Tyukmaeva,  
516 Gompert, Feder, & Nosil, 2020). Overall, finding the exact loci driving species' isolation may be difficult,  
517 as BDMIs are often complex and co-evolve with rapidly evolving heterochromatic DNA (Satyaki et al.,  
518 2014).

## 519 **5 Conclusions**

520 “Introgress-and-resequence” studies that combine interspecific backcrosses with genome-wide  
521 analyses and simulations are an effective approach for identifying BDMIs, in particular those involving  
522 dominant alleles. Our study supports the idea that inversions aid the accumulation of BDMIs due to  
523 reduced recombination, and shows that strong BDMIs coupled with suppressed recombination  
524 effectively restrict introgression beyond the inverted part of the genome in the first two backcross  
525 generations. We conclude that the large X-effect we observed in our experiment may result from at  
526 least one dominant incompatibility locus residing within several overlapping inversions. If the design  
527 were extended to study interspecific F<sub>2</sub> hybrids, assuming that the F<sub>1</sub> female and male hybrids are viable  
528 and fertile, one could investigate recessive-recessive BDMIs in the same way. Overall, we provide a novel  
529 framework for investigating the role of inversions and the X chromosome as genetic barriers to  
530 introgression, which we hope will encourage similar studies on a larger number of species and strains.

## 531 **Acknowledgements**

532 This work was supported by the grants from Academy of Finland project 267244 to AH and projects  
533 268214 and 322980 to MK, as well as a grant from Emil Aaltonen to NP. KL was supported by a Natural  
534 Environmental Research Council (NERC) UK Independent Research fellowship (NE/L011522/1). We  
535 thank Anna-Lotta Hiillos for performing DNA extractions.

## 536 **Data Accessibility**

537 Raw reads will be made publicly available in the SRA (BioProject XXX), and phenotypic data and  
538 Mathematica notebook including simulations in Dryad at the time of publication.

## 539 **Author Contributions**

540 KL, AH and NP designed the study. NP performed the hybrid backcrosses and analysed the genomic data  
541 with input from KL and DRL. KL performed the simulations. AH and MK supervised and funded the  
542 research. NP, AH and KL drafted the manuscript and all authors finalised it.

## 543 **Conflict of interest**

544 The authors declare no conflict of interest.

## 545 **ORCID**

546 Noora Poikela: 0000-0002-4627-9647  
547 Dominik R. Laetsch: 0000-0001-7887-0186  
548 Maaria Kankare: 0000-0003-1541-9050  
549 Anneli Hoikkala: 0000-0001-5407-7992  
550 Konrad Lohse: 0000-0001-9918-058X

## 551 **Ethics declaration**

552 Neither species is endangered, and the flies were collected along watersides on public lands outside  
553 National and State parks, where insect collecting does not require permits in the USA (The Wilderness  
554 Act of 1964, section 6302.15).

555 **References**

- 556 Abbott, R., Albach, D., Ansell, S., Arntzen, J. W., Baird, S. J. E., Bierne, N., ... Zinner, D. (2013). Hybridization and  
557 speciation. *Journal of Evolutionary Biology*, 26(2), 229–246. doi: 10.1111/j.1420-9101.2012.02599.x
- 558 Anderson, E., & Hubricht, L. (1938). Hybridization in *Tradescantia*. III. The evidence for introgressive  
559 hybridization. *American Journal of Botany*, 25(6), 396–402.
- 560 Bank, C., Bürger, R., & Hermisson, J. (2012). The limits to parapatric speciation: Dobzhansky-Muller  
561 incompatibilities in a continen-island model. *Genetics*, 191, 845–863. doi: 10.1534/genetics.111.137513
- 562 Barbash, D. A., Awadalla, P., & Tarone, A. M. (2004). Functional divergence caused by ancient positive selection  
563 of a *Drosophila* hybrid incompatibility locus. *PLoS Biology*, 2(6), 839–848. doi:  
564 10.1371/journal.pbio.0020142
- 565 Barton, N., & Bengtsson, B. O. (1986). The barrier to genetic exchange between hybridising populations.  
566 *Heredity*, 56, 357–376.
- 567 Bikard, D., Patel, D., Le Metté, C., Giorgi, V., Camilleri, C., Bennett, M. J., & Loudet, O. (2009). Divergent evolution  
568 of duplicate genes leads to genetic incompatibilities within *A. thaliana*. *Science*, 323(5914), 623–626. doi:  
569 10.1126/science.1165917
- 570 Butlin, R. K. (2005). Recombination and speciation. *Molecular Ecology*, 14, 2621–2635. doi: 10.1111/j.1365-  
571 294X.2005.02617.x
- 572 Cattani, M. V., & Presgraves, D. C. (2009). Genetics and lineage-specific evolution of a lethal hybrid  
573 incompatibility between *Drosophila mauritiana* and its sibling species. *Genetics*, 155, 1545–1555. doi:  
574 10.1534/genetics.108.098392
- 575 Charlesworth, B., Campos, J. L., & Jackson, B. C. (2018). Faster-X evolution: theory and evidence from *Drosophila*.  
576 *Molecular Ecology*, 27(19), 3753–3771. doi: 10.1111/mec.14534
- 577 Charlesworth, B., Coyne, J. A., & Barton, N. H. (1987). The relative rates of evolution of sex chromosomes and  
578 autosomes. *The American Naturalist*, 130(1), 113–146.
- 579 Chen, S., Zhou, Y., Chen, Y., & Gu, J. (2018). Fastp: An ultra-fast all-in-one FASTQ preprocessor. *Bioinformatics*,  
580 34(17), i884–i890. doi: 10.1093/bioinformatics/bty560
- 581 Coughlan, J. M., & Matute, D. R. (2020). The importance of intrinsic postzygotic barriers throughout the  
582 speciation process. *Philosophical Transactions of the Royal Society B*, 375(1806), 20190533.
- 583 Courret, C., Chang, C. H., Wei, K. H. C., Montchamp-Moreau, C., & Larracuente, A. M. (2019). Meiotic drive  
584 mechanisms: lessons from *Drosophila*. *Proceedings of the Royal Society B: Biological Sciences*, 286(1913),  
585 20191430. doi: 10.1098/rspb.2019.1430
- 586 Coyne, J. A. (2018). “Two rules of speciation” revisited. *Molecular Ecology*, 27(19), 3749–3752. doi:  
587 10.1111/mec.14790
- 588 Coyne, J. A., & Orr, A. H. (2004). Speciation. In M. Sinauer Associates, Sunderland (Ed.), *Sunderland, MA: Sinauer*  
589 *Associates*.
- 590 Crespi, B., & Nosil, P. (2013). Conflictual speciation: species formation via genomic conflict. *Trends in Ecology and*  
591 *Evolution*, 28(1), 48–57. doi: 10.1016/j.tree.2012.08.015
- 592 Crown, K. N., Miller, D. E., Sekelsky, J., & Hawley, R. S. (2018). Local inversion heterozygosity alters  
593 recombination throughout the genome. *Current Biology*, 28, 2984–2990. doi: 10.1016/j.cub.2018.07.004
- 594 Dobzhansky, T. (1940). Speciation as a stage in evolutionary divergence. *The American Naturalist*, 74(753), 312–  
595 321. doi: 10.1086/285850
- 596 Faria, R., Johannesson, K., Butlin, R. K., & Westram, A. M. (2018). Evolving Inversions. *Trends in Ecology &*  
597 *Evolution*, 1–10. doi: 10.1016/j.tree.2018.12.005
- 598 Faria, R., & Navarro, A. (2010). Chromosomal speciation revisited: rearranging theory with pieces of evidence.  
599 *Trends in Ecology & Evolution*, 25(11), 660–669. doi: 10.1016/j.tree.2010.07.008
- 600 Felsenstein, J. (1981). Skepticism towards santa rosalia, or why are there so few kinds of animals? *Evolution*,  
601 35(1), 124–138.
- 602 Fisher, R. A. (1954). A fuller theory of “junctions” in inbreeding. *Heredity*, 8(2), 187–197.
- 603 Fishman, L., Stathos, A., Beardsley, P. M., Williams, C. F., & Hill, J. P. (2013). Chromosomal rearrangements and  
604 the genetics of reproductive barriers in *Mimulus* (monkeyflowers). *Evolution*, 67(9), 2547–2560. doi:  
605 10.1111/evo.12154
- 606 Garrison, E., & Marth, G. (2012). Haplotype-based variant detection from short-read sequencing. *ArXiv Preprint*  
607 *ArXiv*, 1207.3907 [q-bio.GN].
- 608 Gompert, Z., Lucas, L. K., Nice, C. C., & Buerkle, C. A. (2012). Genome divergence and the genetic architecture of

- 609 barriers to gene flow between *Lycaeides idas* and *L. melissa*. *Evolution*, 67(9), 2498–2514. doi:  
610 10.1111/evo.12021
- 611 Haldane, J. B. S. (1922). Sex ratio and unisexual sterility in hybrid animals. *Journal of Genetics*, 12(2), 101–109.
- 612 Harrison, R. G., & Larson, E. L. (2014). Hybridization, introgression, and the nature of species boundaries. *Journal*  
613 *of Heredity*, 105(S1), 795–809. doi: 10.1093/jhered/esu033
- 614 Hoffmann, A. A., & Rieseberg, L. H. (2008). The of impact revisiting in evolution: inversions from genetic  
615 population markers to drivers of adaptive shifts and speciation? *Annual Review of Ecology, Evolution, and*  
616 *Systematics*, 39, 21–42.
- 617 Hoikkala, A., & Poikela, N. (2022). Adaptation and ecological speciation in seasonally varying environments at  
618 high latitudes: *Drosophila virilis* group. *Fly*, 16(1), 85–104. doi: 10.1080/19336934.2021.2016327
- 619 Hopkins, D. P., Tyukmaeva, V. I., Gompert, Z., Feder, J., & Nosil, P. (2020). Functional genomics offers new tests  
620 of speciation hypotheses. *Trends in Ecology and Evolution*, 35(11), 968–971. doi:  
621 10.1016/j.tree.2020.08.001
- 622 Johnson, N. A. (2010). Hybrid incompatibility genes: remnants of a genomic battlefield? *Trends in Genetics*,  
623 26(7), 317–325. doi: 10.1016/j.tig.2010.04.005
- 624 Khadem, M., Camacho, R., & Nóbrega, C. (2011). Studies of the species barrier between *Drosophila subobscura*  
625 and *D. madeirensis* V: the importance of sex-linked inversion in preserving species identity. *Journal of*  
626 *Evolutionary Biology*, 24, 1263–1273. doi: 10.1111/j.1420-9101.2011.02263.x
- 627 Kirkpatrick, M., & Barton, N. (2006). Chromosome inversions, local adaptation and speciation. *Genetics*,  
628 434(May), 419–434. doi: 10.1534/genetics.105.047985
- 629 Landry, C. R., Wittkopp, P. J., Taubes, C. H., Ranz, J. M., Clark, A. G., & Hartl, D. L. (2005). Compensatory cis-trans  
630 evolution and the dysregulation of gene expression in interspecific hybrids of *Drosophila*. *Genetics*, 171(4),  
631 1813–1822. doi: 10.1534/genetics.105.047449
- 632 Lewontin, R. C., & Birch, L. C. (1966). Hybridization as a source of variation for adaptation to new environments.  
633 *Evolution*, 20(3), 315. doi: 10.2307/2406633
- 634 Li, H. (2011). A statistical framework for SNP calling, mutation discovery, association mapping and population  
635 genetical parameter estimation from sequencing data. *Bioinformatics*, 27(21), 2987–2993. doi:  
636 10.1093/bioinformatics/btr509
- 637 Li, H., & Durbin, R. (2009). Fast and accurate short read alignment with Burrows – Wheeler transform.  
638 *Bioinformatics*, 25(14), 1754–1760. doi: 10.1093/bioinformatics/btp324
- 639 Li, H., Handsaker, B., Wysoker, A., Fennell, T., Ruan, J., Homer, N., ... Durbin, R. (2009). The Sequence Alignment /  
640 Map (SAM) Format and SAMtools. *Bioinformatics*, 25, 2078–2079.
- 641 Masly, J. P., Jones, C. D., Noor, M. A. F., Locke, J., & Orr, H. A. (2006). Gene transposition as a cause of hybrid  
642 sterility in *Drosophila*. *Science*, 313(5792), 1448–1450. doi: 10.1126/science.1128721
- 643 Masly, J. P., & Presgraves, D. C. (2007). High-resolution genome-wide dissection of the two rules of speciation in  
644 *Drosophila*. *PLoS Biology*, 5(9), e243. doi: 10.1371/journal.pbio.0050243
- 645 Mcgaugh, S. E., & Noor, M. A. F. (2012). Genomic impacts of chromosomal inversions in parapatric *Drosophila*  
646 species. *Philosophical Transactions of the Royal Society B*, 367, 422–429. doi: 10.1098/rstb.2011.0250
- 647 Navarro, A., & Barton, N. H. (2003). Accumulating postzygotic isolation genes in parapatry: a new twist on  
648 chromosomal speciation. *Evolution*, 57(3), 447–459.
- 649 Noor, M. A. F., Grams, K. L., Bertucci, L. A., & Reiland, J. (2001). Chromosomal inversions and the reproductive  
650 isolation of species. *Proceedings of the National Academy of Sciences of the United States of America*,  
651 98(21), 12084–12088. doi: 10.1073/pnas.221274498
- 652 Nosil, P., & Feder, J. L. (2012). Genomic divergence during speciation: causes and consequences. *Philosophical*  
653 *Transactions of the Royal Society B: Biological Sciences*, 367(1587), 332–342. doi: 10.1098/rstb.2011.0263
- 654 Orr, H. A. (1995). The population genetics of speciation: the evolution of hybrid incompatibilities. *Genetics*, 139,  
655 1805–1813.
- 656 Orr, H. A. (1997). Haldane's rule. *Annual Review of Ecology and Systematics*, 28(1), 195–218.
- 657 Päällysaho, S., Aspi, J., Liimatainen, J. O., & Hoikkala, A. (2003). Role of X chromosomal song genes in the  
658 evolution of species-specific courtship songs in *Drosophila virilis* group species. *Behavior Genetics*, 33(1),  
659 25–32. doi: 10.1023/A:1021047415921
- 660 Patterson, J. T. (1952). Revision of the *montana* complex of the *virilis* species group. *The University of Texas*  
661 *Publication*, 5204, 20–34.
- 662 Poikela, N., Kinnunen, J., Wurdack, M., Kauranen, H., Schmitt, T., Kankare, M., ... Hoikkala, A. (2019). Strength of  
663 sexual and postmating prezygotic barriers varies between sympatric populations with different histories



- 664 and species abundances. *Evolution; International Journal of Organic Evolution*, 73(6), 1182–1199. doi:  
665 10.1111/evo.13732
- 666 Presgraves, D. C. (2010a). Speciation genetics: search for the missing snowball. *Current Biology*, 20(24), R1073–  
667 R1074. doi: 10.1016/j.cub.2010.10.056
- 668 Presgraves, D. C. (2010b). The molecular evolutionary basis of species formation. *Nature Reviews Genetics*, 11(3),  
669 175–180. doi: 10.1038/nrg2718
- 670 Rausch, T., Zichner, T., Schlattl, A., Stütz, A. M., Benes, V., & Korbel, J. O. (2012). DELLY: structural variant  
671 discovery by integrated paired-end and split-read analysis. *Bioinformatics*, 28, 333–339. doi:  
672 10.1093/bioinformatics/bts378
- 673 Ravinet, M., Faria, R., Butlin, R. K., Galindo, J., Bierne, N., Rafajlovic, M., ... Westram, A. M. (2017). Interpreting  
674 the genomic landscape of speciation: a road map for finding barriers to gene flow. *Journal of Evolutionary  
675 Biology*, 30, 1450–1477. doi: 10.1111/jeb.13047
- 676 Rieseberg, L. H. (2001). Chromosomal rearrangements and speciation. *Trends in Ecology & Evolution*, 16(7), 351–  
677 358.
- 678 Salminen, T. S., & Hoikkala, A. (2013). Effect of temperature on the duration of sensitive period and on the  
679 number of photoperiodic cycles required for the induction of reproductive diapause in *Drosophila  
680 montana*. *Journal of Insect Physiology*, 59(4), 450–457. doi: 10.1016/j.jinsphys.2013.02.005
- 681 Satyaki, P. R. V., Cuykendall, T. N., Wei, K. H. C., Brideau, N. J., Kwak, H., Aruna, S., ... Barbash, D. A. (2014). The  
682 Hmr and Lhr hybrid incompatibility genes suppress a broad range of heterochromatic repeats. *PLoS  
683 Genetics*, 10(3), e1004240. doi: 10.1371/journal.pgen.1004240
- 684 Servedio, M. R., & Noor, M. A. F. (2003). The role of reinforcement in speciation: theory and data. *Annual Review  
685 of Ecology, Evolution, and Systematics*, 34, 339–364. doi: 10.1146/132412
- 686 Stevison, L. S., Hoehn, K. B., & Noor, M. A. F. (2011). Effects of inversions on within- and between-species  
687 recombination and divergence. *Genome Biology and Evolution*, 3, 830–841. doi: 10.1093/gbe/evr081
- 688 Sturtevant, A. H. (1921). A case of rearrangement of genes in *Drosophila*. *Proceedings of the National Academy  
689 of Sciences of the United States of America*, 7(8), 235–237.
- 690 Sturtevant, A. H., & Beadle, G. W. (1936). The relations of inversions in the X chromosome of *Drosophila  
691 melanogaster* to crossing over and disjunction. *Genetics*, 21, 554–604.
- 692 Tan, A., Abecasis, R., & Kang, H. M. (2015). Unified representation of genetic variants. *Bioinformatics*, 31(13),  
693 2202–2204. doi: 10.1093/bioinformatics/btv112
- 694 Tang, S., & Presgraves, D. C. (2009). Evolution of the *Drosophila* nuclear pore complex results in multiple hybrid  
695 incompatibilities. *Science*, 323(5915), 779–782.
- 696 Tao, Y., Chen, S., Hartl, D. L., & Laurie, C. C. (2003). Genetic dissection of hybrid incompatibilities between  
697 *Drosophila simulans* and *D. mauritiana*. I. Differential accumulation of hybrid male sterility effects on the X  
698 and autosomes. *Genetics*, 164, 1383–1397.
- 699 Tarasov, A., Vilella, A. J., Cuppen, E., Nijman, I. J., & Prins, P. (2015). Sambamba: fast processing of NGS alignment  
700 formats. *Bioinformatics*, 31(12), 2032–2034. doi: 10.5281/zenodo.13200.Contact
- 701 Thorvaldsdóttir, H., Robinson, J. T., & Mesirov, J. P. (2012). Integrative Genomics Viewer (IGV): high-performance  
702 genomics data visualization and exploration. *Briefings in Bioinformatics*, 14(2), 178–192. doi:  
703 10.1093/bib/bbs017
- 704 Throckmorton, L. H. (1982). The *virilis* species group. *The Genetics and Biogeography of Drosophila*, 3, 227–296.
- 705 Turelli, M., & Orr, H. A. (1995). The dominance theory of Haldane's rule. *Genetics*, 140(1), 389–402.
- 706 Turelli, M., & Orr, H. A. (2000). Dominance, epistasis and the genetics of postzygotic isolation. *Genetics*, 154(4),  
707 1663–1679.
- 708 Turelli, Michael, & Moyle, L. C. (2007). Asymmetric postmating isolation: Darwin's corollary to Haldane's rule.  
709 *Genetics*, 176, 1059–1088. doi: 10.1534/genetics.106.065979
- 710 Wu, C. I. (2001). The genic view of the process of speciation. *Journal of Evolutionary Biology*, Vol. 14, pp. 851–  
711 865. doi: 10.1046/j.1420-9101.2001.00335.x
- 712
