1 Experimental introgression in *Drosophila*: asymmetric postzygotic isolation associated with  
2 chromosomal inversions and an incompatibility locus on the X chromosome

3

4 Running title: Experimental introgression in *Drosophila*

5

6 Authors:

7 Poikela N.<sup>1</sup>, Laetsch D. R.<sup>2</sup>, Kankare M.<sup>1</sup>, Hoikkala A.<sup>\*1</sup>, & Lohse K.<sup>\*2</sup>

8 \* Shared last authorship

9 <sup>1</sup> Department of Biological and Environmental Science, University of Jyväskylä, Finland

10 <sup>2</sup> Institute of Evolutionary Biology, University of Edinburgh, United Kingdom

11

12 Corresponding author:

13 Noora Poikela, Department of Biological and Environmental Science, P.O. Box 35, FI-40014 University of  
14 Jyväskylä, Finland

15 E-mail: [noora.p.poikela@gmail.com](mailto:noora.p.poikela@gmail.com)

16 Phone: +358 40 5383527

17 **Abstract**

18 Interspecific gene flow (introgression) is an important source of new genetic variation, but selection  
19 against it can reinforce reproductive barriers between interbreeding species. We used an experimental  
20 approach to trace the role of chromosomal inversions and incompatibility genes in preventing  
21 introgression between two partly sympatric *Drosophila virilis* group species, *D. flavomontana* and *D.*  
22 *montana*. We backcrossed F<sub>1</sub> hybrid females from a cross between *D. flavomontana* female and *D.*  
23 *montana* male with the males of the parental species for two generations and sequenced pools of  
24 parental strains and their reciprocal 2<sup>nd</sup> generation backcross (BC<sub>2</sub>mon and BC<sub>2</sub>fla) females. Contrasting  
25 the observed amount of introgression (mean hybrid index, HI) in BC<sub>2</sub> female pools along the genome to  
26 simulations under different scenarios allowed us to identify chromosomal regions of restricted and  
27 increased introgression. We found no deviation from the HI expected under a neutral null model for any  
28 chromosome for the BC<sub>2</sub>mon pool, suggesting no evidence for genetic incompatibilities in backcrosses  
29 towards *D. montana*. In contrast, the BC<sub>2</sub>fla pool showed high variation in the observed HI between  
30 different chromosomes, and massive reduction of introgression on the X chromosome (large X-effect).  
31 This observation is compatible with reduced recombination combined with at least one dominant  
32 incompatibility locus residing within the X inversion(s). Overall, our study suggests that genetic  
33 incompatibilities arising within chromosomal inversions can play an important role in speciation.

34

35 **Keywords:** chromosomal inversions, experimental evolution, genetic incompatibilities, hybridization,  
36 introgression, X-effect

## 37 Introduction

38 Interspecific gene flow (introgression) is an important source of genetic variation for adaptation to new  
39 environments (Abbott et al., 2013; Anderson & Hubricht, 1938; Lewontin & Birch, 1966). At the same  
40 time, selection against introgression at certain loci acts to maintain barrier loci and protect species'  
41 integrity from the negative effects of hybridization (Barton & Bengtsson, 1986; Ravinet et al., 2017;  
42 Servedio & Noor, 2003; Wu, 2001). The patterns of genomic divergence and the permeability of species  
43 boundaries in certain genomic regions provide valuable insights into the genomic regions that  
44 contribute to speciation (Harrison & Larson, 2014). However, we still lack a good understanding of how  
45 barrier genes are arrayed within the genome, how effectively and in what generation they restrict  
46 introgression, and what kind of role chromosomal inversions and sex chromosomes play in maintaining  
47 genetic barriers (Butlin, 2005; Coughlan & Matute, 2020; Coyne & Orr, 2004; Faria & Navarro, 2010;  
48 Gompert, Lucas, Nice, & Buerkle, 2012; Nosil & Feder, 2012).

49 Speciation in isolation (allopatry), occurring via drift or indirect effects of selection, can lead to the  
50 "incidental" establishment of intrinsic genetic incompatibilities (Coyne & Orr, 2004; Tang & Presgraves,  
51 2009). These incompatibilities generally involve negative epistatic interactions between two or more  
52 loci, where new alleles arising in one or both of the interacting lineages function well in their own genetic  
53 background, but interact negatively with the alleles of other species in hybrids (Bateson-Dobzhansky-  
54 Muller incompatibilities, BDMIs or DMIs; Coyne & Orr, 2004; Orr, 1995; Presgraves, 2010b). Lack of gene  
55 flow may also increase the fixation probability of meiotic drive loci (loci that manipulate meiotic process  
56 to favour their own transmission) and their suppressors within each population and drive the genomic  
57 divergence of these populations (Crespi & Nosil, 2013). Compared to allopatric speciation, where both  
58 BDMIs and neutral differences between species are expected to build up randomly along the genome,  
59 divergence with gene flow leads to clusters of species- or population-specific loci that are sheltered  
60 from recombination (Abbott et al., 2013; Butlin, 2005; Felsenstein, 1981). Accordingly, an accumulation  
61 of BDMIs between species may be drastically different with and without gene flow. Importantly, in the  
62 presence of gene flow BDMIs can only accumulate if they are favoured by selection (Bank, Bürger, &  
63 Hermisson, 2012).

64 Chromosomal inversions are a major factor rearranging the genome and gene order, and inducing  
65 changes in recombination rates, gene interactions and expression patterns (Hoffmann & Rieseberg,  
66 2008; Kirkpatrick & Barton, 2006; Sturtevant, 1921; Dobzhansky, 1940). Inversions may gain a fitness  
67 advantage and spread through conspecific populations, if they reduce recombination within co-adapted  
68 gene complexes important in adaptation and/or in maintaining species integrity (Kirkpatrick & Barton,  
69 2006; Navarro & Barton, 2003). Once inversions have become fixed between the species, they can  
70 generate postzygotic isolation and limit gene flow between the species through problems in gamete  
71 formation and/or in the build-up of BDMIs. Single recombination events (cross-overs) within paracentric  
72 inversions (breakpoints on different sides of the centromere) can produce malformed gametes with  
73 dicentric and acentric chromosomes (Coyne & Orr, 2004; Hoffmann & Rieseberg, 2008; Rieseberg,  
74 2001). However, in *Drosophila* the problems with malformed gametes are partially avoided, since these  
75 gametes remain in the polar nuclei and do not enter the developing gametes (Hoffmann & Rieseberg,  
76 2008; Sturtevant & Beadle, 1936). Perhaps more importantly, reduced recombination across inverted  
77 regions, particularly near inversion breakpoints and within overlapping inversions, facilitates the build-  
78 up of BDMIs via divergent selection and/or drift (Fishman, Stathos, Beardsley, Williams, & Hill, 2013;  
79 Khadem, Camacho, & Nóbrega, 2011; Mcgaugh & Noor, 2012; Navarro & Barton, 2003; Noor, Grams,  
80 Bertucci, & Reiland, 2001). While blocks of genetic material can occasionally be exchanged through  
81 double cross-overs within long inversions (Navarro, Betrán, Barbadilla, & Ruiz, 1997) and smaller DNA  
82 sections (several hundred bps) through gene conversion events within any kind of inversions (Korunes &  
83 Noor, 2018), recombination within inversions generally remains lower than on colinear chromosome

84 sections (Hoffmann & Rieseberg, 2008). Thus, species-specific inversions harbouring BDMLs may act as  
85 strong barriers to gene flow (Hoffmann & Rieseberg, 2008; Noor et al., 2001).

86 The disproportionate involvement of sex chromosomes in reproductive isolation in many systems is  
87 captured by two general observations: Haldane's rule – the increased  $F_1$  inviability and sterility of the  
88 heterogametic sex compared to the homogametic sex (Haldane, 1922; Orr, 1997; Turelli & Orr, 2000) –  
89 and the large X-effect – the fact that the X chromosome shows a disproportionately large effect on the  
90 sterility and inviability of backcross hybrids (Masly & Presgraves, 2007; Turelli & Orr, 2000). Explanation  
91 for both observations often presume recessivity of X-linked alleles, which can lead to more pronounced  
92 effects in hemizygous than in heterozygous hybrids ("Dominance theory"; Coyne & Orr, 2004; Turelli &  
93 Orr, 1995, 2000) and/or rapid evolution of X-linked alleles facilitating BDMLs as a byproduct ("Faster X  
94 evolution"; Charlesworth, Campos, & Jackson, 2018; Charlesworth, Coyne, & Barton, 1987). The X  
95 chromosome has also been suggested to be enriched for genes that create postzygotic isolation in  
96 hybrids compared to autosomes (Coyne, 2018). In particular, meiotic drive loci are more frequent on  
97 the X than on autosomes, and incompatibilities between drivers and their suppressors in hybrids may  
98 generate problems in hybrid development (Courret, Chang, Wei, Montchamp-Moreau, & Larracuente,  
99 2019; Crespi & Nosil, 2013; Crown, Miller, Sekelsky, & Hawley, 2018).

100 Pairwise BDMLs may involve substitutions in both diverging lineages, or derived substitutions in one  
101 lineage and preserved ancestral alleles in another lineage (Barbash, Awadalla, & Tarone, 2004; Cattani  
102 & Presgraves, 2009; Coyne & Orr, 2004). BDMLs can also result from cumulative effects of many small  
103 incompatibilities or from a single incompatibility between two complementary genes, and the  
104 complexity of the incompatibility interaction does not reflect the severity of the barrier (Orr, 1995;  
105 Presgraves, 2010a). Importantly, and in contrast to interactions within a locus where a dominant allele  
106 masks a recessive allele, in epistatic interactions between different loci a dominant allele at one locus  
107 may interact with dominant or recessive alleles at other loci. Epistatic interactions involving dominant  
108 alleles are of special interest in the context of BDMLs, but they have received less attention than BDMLs  
109 involving recessive alleles.

110 Two closely-related species of the *Drosophila virilis* group, *D. montana* and *D. flavomontana*, provide an  
111 excellent test case for studying the evolution of BDMLs. The species originate from the Rocky Mountains  
112 of North America, where the divergence of the *montana* complex species (*D. flavomontana*, *D. lacicola*  
113 and *D. borealis*) most likely occurred (Hoikkala & Poikela, 2022; Patterson, 1952; Throckmorton, 1982).  
114 *D. montana* has expanded around the northern hemisphere, whereas *D. flavomontana* has remained in  
115 North America (Hoikkala & Poikela, 2022). *D. montana* lives generally in colder environments and uses  
116 different host trees than *D. flavomontana* (Patterson, 1952; Throckmorton, 1982). Reproductive  
117 barriers between *D. montana* females and *D. flavomontana* males are nearly complete, with extremely  
118 strong prezygotic barriers and inviability and sterility of rarely produced  $F_1$  hybrids (Noora Poikela et al.,  
119 2019). However, in crosses between *D. flavomontana* females and *D. montana* males, strong postzygotic  
120 isolation is accompanied by prezygotic barriers of variable strength, and  $F_1$  hybrid females can still be  
121 crossed with the males of both parental species to obtain backcross progenies in both directions (Noora  
122 Poikela et al., 2019). Interspecific hybrids have also reportedly been found in nature (Patterson, 1952;  
123 Throckmorton, 1982). Our recent demographic modelling shows that the species have diverged ~3 Mya,  
124 with low levels of postdivergence gene flow from *D. montana* to *D. flavomontana* (Poikela, Laetsch,  
125 Lohse, & Kankare, 2022). Moreover, we found several inversions that were fixed between the species  
126 in all studied individuals across different populations in North America (Poikela et al., 2022). These  
127 inversions were already present in species' common ancestor, and they may have contributed to the  
128 build-up and maintenance of adaptive traits and reproductive barriers by restricting gene flow between  
129 the evolving lineages (Poikela et al., 2022).

130 The goal of this study was to determine which genomic regions are likely to accommodate dominant  
131 BDMIs in hybrids between *D. montana* and *D. flavomontana*, paying special attention to fixed inversions  
132 and the X chromosome. We investigated BDMIs between these species experimentally by sequencing  
133 pools of *D. montana* females from an allopatric population and *D. flavomontana* females from a  
134 (presently) parapatric population, as well as pools of 2<sup>nd</sup> backcross generation (BC<sub>2</sub>) females in both  
135 directions (Fig. 1). We identified chromosomal regions with decreased and increased introgression by  
136 quantifying the amount of introgressed genetic material (mean hybrid index, HI) along the genome in  
137 both backcross pools. We then compared the observed HI to the distribution of chromosome-wide HI  
138 in *in silico* replicates of this “introgress-and-resequence” experiment under contrasting assumptions  
139 about the presence and location of BDMIs. Since this experimental design involved backcross females,  
140 we were able to detect only BDMIs involving a dominant allele, while the recessive-recessive BDMIs  
141 remained masked (Table 1). Our main questions were:

- 142 (i) Does the strength and genomic distribution of genetic incompatibilities between *D.*  
143 *montana* and *D. flavomontana* differ between the reciprocal crosses?
- 144 (ii) Do the species show increased genetic divergence and decreased introgression within  
145 chromosomal inversions, and could this be caused by inversions’ propensity to suppress  
146 recombination and harbour genetic incompatibilities?
- 147 (iii) Does the X chromosome show less introgression than autosomes (large X-effect)? And if  
148 yes, why?

## 149 **Materials and methods**

### 150 **Fly material**

151 We collected fertilised *D. montana* females from Seward, Alaska, USA (60°09’N; 149°27’W) and *D.*  
152 *flavomontana* females from Livingston, Montana, USA (45°20’N; 110°36’W) in 2013. The distance  
153 between the sites is ~3000 km. Alaskan *D. montana* can be regarded as an allopatric population, as *D.*  
154 *flavomontana* has not been found above 54°N (Noora Poikela et al., 2019). In contrast, *D. flavomontana*  
155 population from Montana can be regarded as a parapatric, as the two species are known to coexist in  
156 the Rocky Mountains, even though we found only *D. flavomontana* on the collecting site (Noora Poikela  
157 et al., 2019). We maintained the strains established from the progenies of single wild-caught *D. montana*  
158 and *D. flavomontana* females in continuous light and 19 °C for about 23 generations (~3 years) in the  
159 University of Jyväskylä (Finland) prior to their use in the present study. For the crosses, the flies were  
160 sexed under light CO<sub>2</sub> anaesthesia within three days after emergence, when they were still virgins. Males  
161 and females were transferred into fresh malt-vials once a week and used in the crossing experiments at  
162 age 20 ± 2 days when they were sexually mature (Salminen & Hoikkala, 2013).

### 163 **Crossing experiment**

164 We started the crossing experiment by performing a single-pair cross between *D. flavomontana* female  
165 (strain MT13F11) and *D. montana* male (strain SE13F37), as reciprocal cross is not successful. Our  
166 crossing design (outlined in Fig. 1) only involved hybrid females because F<sub>1</sub> males are largely sterile  
167 (Päällysaho, Aspi, Liimatainen, & Hoikkala, 2003; Noora Poikela et al., 2019), and because *Drosophila*  
168 males lack recombination (crossing-over) in meiosis. The initial cross produced seven F<sub>1</sub> females, which  
169 were backcrossed towards both parental species: four were mated to *D. montana* males and three to  
170 *D. flavomontana* males. The 1<sup>st</sup> backcross generation females (BC<sub>1</sub>mon and BC<sub>1</sub>fla females) were  
171 backcrossed to the same paternal species as in the previous generation to obtain BC<sub>2</sub>mon and BC<sub>2</sub>fla  
172 females (82 females in both directions). BC<sub>2</sub> females were collected within three days after their  
173 emergence and stored in -20 °C for DNA extractions.

## 174 Fertility of BC<sub>1</sub> females

175 We defined the fertility of BC<sub>1</sub> females by checking whether they produced progeny after mating with  
176 a *D. montana* or *D. flavomontana* male (Fig. 1). Each BC<sub>1</sub> female was placed in a malt vial with a single  
177 male of either species. Once the flies mated, the couple was kept together in the vial so that the female  
178 could remate and lay eggs until she died. BC<sub>1</sub> females were considered fertile, if they produced at least  
179 some larval, pupal, and/or adult-stage offspring (1=fertile, 0=sterile). We used a one-sample Student's  
180 t-test (*t-test* function) to test whether the BC<sub>1</sub> females from the reciprocal crosses showed reduced  
181 fertility, when the expected fertility was 1. We also compared the fertility of BC<sub>1</sub> females between the  
182 reciprocal crosses to define possible asymmetries (BC<sub>1</sub>mon vs. BC<sub>1</sub>fla), using a generalised linear model  
183 (GLM) with Binomial distribution (1=fertile, 0=sterile) (*glm* function). All analyses were conducted in  
184 base R v1.2.1335-1 and R studio v3.6.1.

## 185 Pool-sequencing, mapping, and variant calling

186 We made DNA extractions from four pools, one pool of each parental strain (*D. montana* SE13F37 and  
187 *D. flavomontana* MT13F11) and pools for the two 2<sup>nd</sup> generation backcrosses (BC<sub>2</sub>mon and BC<sub>2</sub>fla). Each  
188 pool consisted of 82 females. We used cetyltrimethylammonium bromide (CTAB) solution with RNase  
189 treatment, Phenol-Chloroform-Isoamyl alcohol (25:24:1) and Chloroform-Isoamyl alcohol (24:1)  
190 washing steps and ethanol precipitation. Nextera library preparation and 150 bp Illumina paired-end  
191 sequencing were performed on two lanes using HiSeq4000 Illumina instrument at Edinburgh Genomics,  
192 UK. Illumina paired-end reads of all four samples were quality-checked with FastQC v0.11.8 (Andrews  
193 2010) and trimmed for adapter contamination and low-quality bases using fastp v0.20.0 (using settings  
194 --detect\_adapter\_for\_pe, --cut\_front, --cut\_tail, --cut\_window\_size 4, --cut\_mean\_quality 20) (Chen,  
195 Zhou, Chen, & Gu, 2018). After filtering, the total number of reads per pool varied from 153 to 174  
196 million, the mean length and insert size peak being 141-143bp and 150bp, respectively (Table S1).

197 To consider potential effects of reference bias on the results, we performed the analyses using both *D.*  
198 *flavomontana* and *D. montana* chromosome-level reference genomes (Poikela et al., 2022). The  
199 genomes cover most regions for all the chromosomes, except for the 6th dot chromosome, and the  
200 total length of *D. flavomontana* genome is 142 Mb and that of *D. montana* 146 Mb. Filtered Illumina  
201 reads of each sample were mapped to the unmasked reference genomes using BWA mem (Burrows-  
202 Wheeler Aligner) v0.7.17 with read group information (Li & Durbin, 2009). The alignments were sorted  
203 with SAMtools v1.10 (Li et al., 2009) and PCR duplicates marked with sambamba v0.7.0 (Tarasov, Vilella,  
204 Cuppen, Nijman, & Prins, 2015). The separate BAM-files of each sample were merged and filtered for  
205 mapping quality of >20 using SAMtools. The mean coverage of the pools varied from 163 to 193 based  
206 on *D. flavomontana* reference, and 151 to 204 based on *D. montana* reference (Table S1). Allele counts  
207 for each sample at each genomic position were obtained with SAMtools mpileup using options to  
208 exclude indels and to keep reads with a mapping quality of >20 and sites with a base quality of >15. The  
209 resulting BAM-files were used for variant calling with the unmasked version of the reference genomes  
210 using heuristic SNP calling software PoolSNP (Kapun et al., 2020). In PoolSNP, we specified a minimum  
211 count of 5 to call a SNP, and a minimum coverage of 80 to reliably calculate allele frequencies and to  
212 minimize potential reference bias. For a maximum coverage, we considered positions within the 95%  
213 coverage percentile for a given sample and chromosome. Variant calling detected a total of 4,489,437  
214 biallelic SNPs when using *D. flavomontana* reference genome, and 4,407,029 biallelic SNPs when using  
215 *D. montana* reference genome.

## 216 Inversion breakpoints

217 The breakpoints of fixed inversions between *D. montana* and *D. flavomontana* on the X chromosome  
218 and chromosomes 2L, 4 and 5 were obtained from Poikela et al. (2022). The presence of the inversions  
219 in Illumina samples of parental pools was verified by passing the respective BAM-files to Delly v0.8.1

220 (Rausch et al., 2012), which identifies structural variants based on paired-end read orientation and split-  
221 read evidence. The inversion breakpoints were also confirmed visually by checking the orientation and  
222 insert size around each breakpoint in the Interactive Genomics Viewer (Thorvaldsdóttir, Robinson, &  
223 Mesirov, 2012) (Example plot shown in Fig. S1). Inversion breakpoints are shown in Fig. 3-4; Table S2;  
224 Fig. S3-S6).

## 225 Genetic differentiation, hybrid index and the types of genetic incompatibilities

226 The expected amount of genetic material transferred from one species into the other halves with every  
227 backcross generation (Fig. 1). Given species-specific alleles, we can measure introgression via the hybrid  
228 index (HI), which can be defined simply as the heterospecific fraction of genome in an individual (or a  
229 pool of individuals). Thus, in the pool of 2<sup>nd</sup> backcross generation hybrid females, the genome-wide HI  
230 is expected to be 12.5% in the absence of BDMIs (Fig. 1). However, given the random inheritance of  
231 chromatids in gametes and the randomness of cross-over locations, we expect substantial variation  
232 around the expected mean HI, even in the absence of BDMIs.

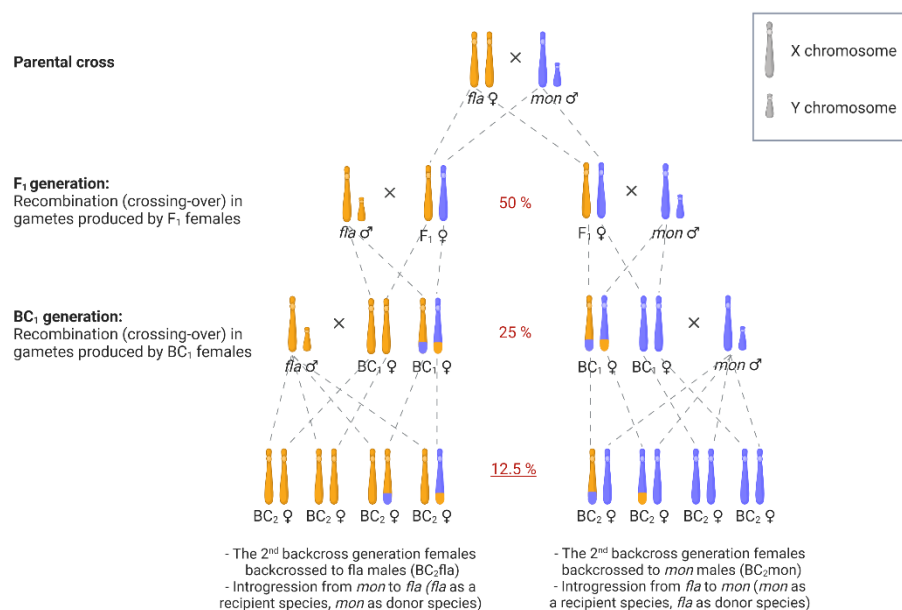

233 Figure 1. Illustration of the crossing experiment showing the inheritance of sex chromosomes (inheritance of  
234 autosomes is similar to that of female X chromosomes). F<sub>1</sub> females, produced in a single-pair cross between *D.*  
235 *flavomontana* (fla) female and *D. montana* (mon) male, were backcrossed to either *D. flavomontana* or *D.*  
236 *montana* male. In the next generation, each BC<sub>1</sub> female was mated with a male of its paternal species. In every  
237 generation, the expected amount of genetic material that is transferred from the gene pool of one species into  
238 the gene pool of another one (introgression) is halved (red percentages). Thus, under a null neutral model, we  
239 expect a mean HI of 12.5 % for the BC<sub>2</sub> pools that were sequenced. Note that recombination occurring in the  
240 gametes produced by F<sub>1</sub> and BC<sub>1</sub> females creates variation in the expected amount of HI. For simplicity, the figure  
241 shows products of only one cross-over event that has occurred in each backcross direction.  
242

243 To estimate the amount of introgression in the BC<sub>2</sub> pools, we computed the HI in both pools along the  
244 genome based on species-diagnostic SNPs (variants that are differentially fixed between the parental  
245 pools). Differentially fixed SNPs were defined as SNPs with allele frequency 1 in one parental pool and  
246 0 in the other one (1 = all reads supporting the alternate allele, 0 = all reads supporting the reference  
247 allele). The total number of SNPs that were differentially fixed between the parental species was  
248 1,668,294 when using *D. flavomontana* reference genome, and 1,570,556 when using *D. montana*  
249 reference genome. For each differentially fixed SNP between the species, allele frequencies were  
250 calculated by dividing “alternate read depth (AD)” by “the total read depth (DP)”. To enable comparison

251 between backcross directions, the allele frequencies for non-reference alleles were calculated with the  
252 formula “1 - allele frequency” (e.g. allele frequency of 87.5% would become 12.5%). Finally, given that  
253 a maximum allele frequency for a SNP in a hybrid is 0.5, any SNPs with an allele frequency over 0.5 were  
254 discarded (78 out of 1,668,372 and 48 out of 1,570,604 when using *D. flavomontana* and *D. montana*  
255 reference genomes, respectively).

256 We compared colinear and inverted parts within each chromosome in terms of the density of diagnostic  
257 SNPs. Each chromosome was divided into 200kb non-overlapping windows and the number of  
258 diagnostic SNPs in each window was counted using a custom script  
259 ([https://github.com/vihoikka/SNP\\_mapper/blob/main/snp\\_binner.py](https://github.com/vihoikka/SNP_mapper/blob/main/snp_binner.py)). When analysing data using *D.*  
260 *flavomontana* reference genome, the chromosomes were divided in 53-153 windows depending on the  
261 chromosome length, while the respective values for *D. montana* reference genome were 55-163  
262 windows per chromosome. The data was analysed using a generalised linear model (*glm* function) with  
263 a Poisson distribution, where the number of window-wise SNPs was used as a response variable, and  
264 either different chromosomes, or different genomic partitions (colinear, inverted) within each  
265 chromosome were used as explanatory variables. The analyses were performed in base R using R  
266 v1.2.1335-1 and R studio v3.6.1.

267 Using the diagnostic SNPs, we calculated the mean hybrid index (HI) and its standard deviation  
268 separately for different chromosomes for BC<sub>2</sub>fla and BC<sub>2</sub>mon pools. We also calculated the number of  
269 SNPs without any introgressed material (HI = 0%) separately for each chromosome for both pools.  
270 Finally, we plotted HI in non-overlapping windows of 400 SNPs for each chromosome and BC<sub>2</sub> pool using  
271 a custom script ([https://github.com/vihoikka/SNP\\_mapper/blob/main/datasmoother2.py](https://github.com/vihoikka/SNP_mapper/blob/main/datasmoother2.py)). In principle,  
272 crossover (CO) events involving the two ancestral backgrounds (Fisher junctions; Fisher, 1954) should  
273 be visible as step changes in the HI of each pool. Assuming on average one CO per chromosome and  
274 female meiosis, the expected number of CO events per chromosome generated during the experiment  
275 is given by the total number of females ( $n_{BC_1} + n_{BC_2}$ ; Table S3) contributing to each pool (96 and 104  
276 for BC<sub>2</sub>mon and BC<sub>2</sub>fla pools, respectively). Note that the number of Fisher junctions between *D.*  
277 *montana* and *D. flavomontana* ancestral material is lower since not all CO events in BC<sub>1</sub> females  
278 generate junctions between heterospecific ancestry. In practice, however, the resolution especially for  
279 the junctions that are unique to a single BC<sub>2</sub> individual (which correspond to a change in allele frequency  
280 of 1/82) is limited by the randomness in sequencing coverage of the pool.

281 Given that this experiment was started with a single-pair cross between the parental species and  
282 continued with repeated backcrosses between hybrid females and parental males, all backcross  
283 individuals inherited a maximum of one allele per locus from the donor species (Fig. 1). Thus, the  
284 genomes of BC individuals are a mosaic of two types of tracts: i) homozygous for the genetic background  
285 of the recipient species or ii) heterozygous between species. This limits the types of BDMIs that can be  
286 expressed (Table 1). Dominant-dominant pairwise BDMIs arise already in the F<sub>1</sub> generation and, if  
287 severe, can cause sterility/inviability in both sexes. Recessive-recessive pairwise BDMIs cannot be  
288 detected in our experiment even if they were X-linked since i) all BC individuals involved in the  
289 experiment were females (no hemizyosity), and ii) the expression of these incompatibilities would  
290 require homozygous tracts for both species (Fig. 1). Hence, dominant-recessive BDMIs are the only  
291 strong postzygotic barriers that we expect to detect in this study.



292 Table 1. BDM model for incompatibilities (see Coyne & Orr, 2004). Here gene  $A_1$  of one species interacts negatively  
293 with gene  $B_2$  of another species. Underscore represents any allele, and it does not change the outcome. Note that  
294 dominance refers to an allele's effect on fitness on a hybrid genetic background, and it does not necessarily assume  
295 dominance of alleles on their normal background within species.

---

**Dominant-dominant incompatibility (both loci act dominantly):**

$A_1\_B_2\_$  hybrids are affected in the  $F_1$  generation

**Recessive-recessive incompatibility (both loci act recessively):**

$A_1A_1B_2B_2$  hybrids are affected in the  $F_2$  generation

**Dominant-recessive incompatibility ( $A_1$  acts dominantly,  $B_2B_2$  recessively):**

$A_1\_B_2B_2$  hybrids are affected in backcross generations

---

## 296 Simulating the backcross and re-sequence experiment

297 Given the stochastic nature of inheritance of chromatids in gametes and the randomness of cross-over  
298 locations in meiosis, we expected substantial variation in the mean HI (in the  $BC_2$  pools for each  
299 chromosome) around the expectation of 12.5% (Fig. 1). To evaluate whether the observed mean HI of  
300 each chromosome deviates significantly from that expected under simple models of introgression with  
301 or without inversions and/or extreme BDMIs, we simulated the crossing experiment under three  
302 different scenarios using *Mathematica* (Wolfram Research, Inc., version 11.02 Champaign, IL). All  
303 simulations were conditioned on the number of  $BC_2$  females each  $BC_1$  female contributes to the pool  
304 (Table S3). We also assumed one cross-over per female per chromosome in meiosis (a map length of  
305 50cM). Given that the experiment involves two generations of crosses between hybrid females and pure  
306 parental males, our simulation only tracks the haplotype of female gametes contributing to  $BC_1$  and  $BC_2$   
307 individuals. All *in silico* backcross experiments were simulated, separately for each chromosome, 10,000  
308 times to obtain 5% and 95% quantiles for the mean HI.

309 First, we simulated the experiment under a simple null model of neutral introgression, i.e. assuming no  
310 BDMIs and no cross-over suppression due to inversions (SIM1, Fig. 2A). Second, we simulated the  
311 experiment similarly under neutrality, but including the breakpoint locations of inversions that are  
312 alternately fixed between *D. montana* and *D. flavomontana*. This was done simply by disallowing cross-  
313 over events within inverted regions (inversions breakpoints in Table S2), i.e. we did not attempt to  
314 include interchromosomal effects (SIM2, Fig. 2B). Third, we simulated the experiment under a model  
315 that assumes a single BDMI at a random position within the inverted part of the chromosome (SIM3,  
316 Fig. 2C). This single locus cannot be introgressed beyond the  $F_1$  generation, i.e.  $BC_1$  and  $BC_2$  females that  
317 are heterozygous for this locus are not produced. Note that while we refer to this as a BDMI for  
318 simplicity, we did not explicitly simulate pairwise incompatibilities. Thus, this locus can be regarded as  
319 a BDMI involving a dominant allele on the introgressing background (donor species) that is incompatible  
320 with one or more recessive alleles in the recipient background.

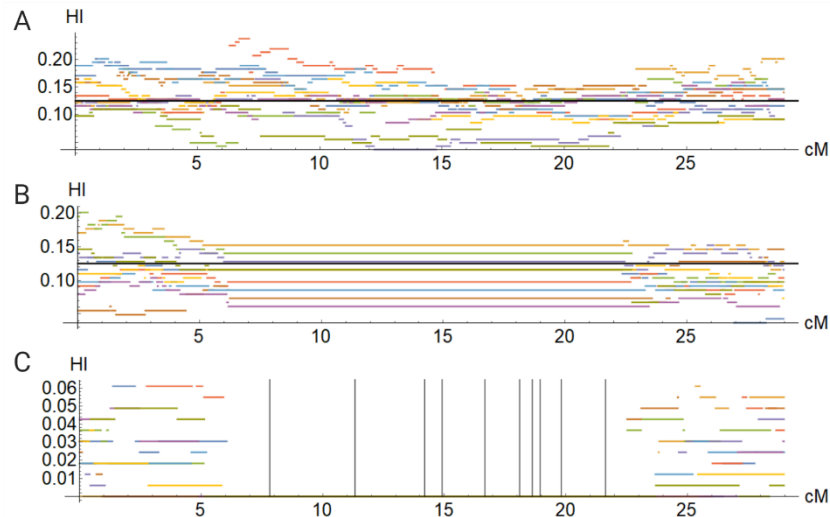

321  
322 Figure 2. Introgression experiment was simulated under different scenarios. Example plots of simulated hybrid  
323 indices (HI) (A) under neutrality, (B) in the presence of neutral inversions, and (C) in the presence of inversions  
324 with a single dominant BDMI (grey vertical lines illustrate BDMIs). For simplicity, here simulations were run 10  
325 times.

## 326 Results

### 327 **BC<sub>1</sub> females from the backcrosses towards *D. flavomontana* showed stronger genetic incompatibilities** 328 **/ postzygotic isolation than the ones from the backcrosses towards *D. montana***

329 In BC<sub>1</sub> generation, the proportion of fertile females was 75% and 42% among the BC<sub>1</sub>mon and BC<sub>1</sub>fla  
330 hybrids, respectively, and was significantly reduced in both reciprocal crosses when compared to the  
331 expected fertility of 1 (BC<sub>1</sub>mon:  $t_{19} = -2.52$ ,  $P = 0.021$ ; BC<sub>1</sub>fla:  $t_{54} = -8.67$ ,  $P = 8.371e^{-12}$ ). Furthermore, the  
332 proportion of fertile BC<sub>1</sub>mon females (75%) was significantly higher than that of BC<sub>1</sub>fla females (42%)  
333 (GLM,  $z_{1,73} = -2.45$ ,  $P = 0.015$ ; Fig. S2). These findings show that while both crosses suffer from BDMIs  
334 affecting female fertility, these incompatibilities are more pronounced in backcrosses towards *D.*  
335 *flavomontana* than towards *D. montana* (asymmetric postzygotic isolation, or unidirectional  
336 incompatibilities in the sense of Turelli & Moyle, 2007).

### 337 **Genetic divergence between *D. montana* and *D. flavomontana* has accumulated within inverted** 338 **chromosome regions especially on the X chromosome**

339 We performed all genomic analyses using both *D. flavomontana* and *D. montana* reference genomes to  
340 be able to evaluate the potential effect of reference bias on the results. Here, we focus mainly on  
341 analyses that use *D. flavomontana* as a reference genome, since the backcrosses towards *D.*  
342 *flavomontana* showed more evidence for incompatibilities than the ones towards *D. montana*. Results  
343 based on the *D. montana* reference genome are also discussed here, but the corresponding figures and  
344 tables are given in the Supporting information.

345 Irrespective of which species was used as a reference genome, the density of SNPs that were  
346 differentially fixed between *D. montana* and *D. flavomontana* parental pools was higher on the X  
347 chromosome than on any of the autosomes ( $P < 0.001$ ; Fig. 3; Fig. S3; Table S4). Moreover, the density  
348 of fixed differences was higher in inverted compared to the colinear regions within each chromosome  
349 containing inversions ( $P < 0.001$ ; Fig. 3; Fig. S3; Table S5), as expected due to the reduction in  
350 recombination within inverted regions (note that chromosomes 2R and 3 have no inversions).

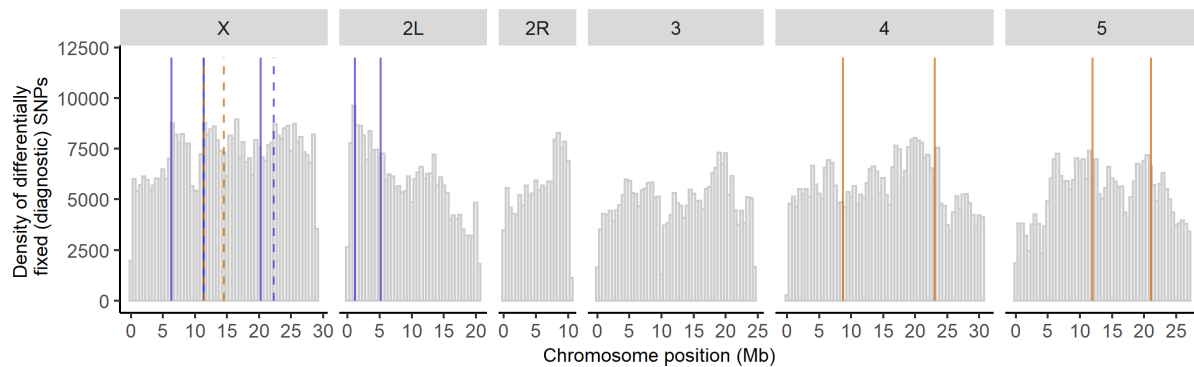

351

352 Figure 3. Density of differentially fixed SNPs (in 200kb windows) between the parental species across each  
353 chromosome (*D. flavomontana* used as a reference genome). Orange and blue vertical lines represent species-  
354 specific *D. flavomontana* and *D. montana* chromosomal inversions, respectively. Solid and dashed vertical lines  
355 describe breakpoints of different inversions. Chromosome 2 involves left (2L) and right (2R) arms separated by a  
356 submetacentric centromere. Corresponding data using *D. montana* as the reference genome shown in Fig. S3.

### 357 Large differences in HI between chromosomes – evidence for BDMIs located within X chromosomal 358 inversions

359 The mean amount of introgression (hybrid index, HI) of hybrids backcrossed to *D. montana* (BC<sub>2</sub>mon)  
360 did not deviate significantly from the neutral expectation of 12.5% for any chromosome (SIM1). This  
361 was true irrespective of whether the reference genome of *D. flavomontana* (Fig. 4, 5A, S4; Table 6) or  
362 *D. montana* (Fig. S5, S6, S7A, Table 6) was used. Moreover, in both analyses, the fraction of diagnostic  
363 SNPs that showed no introgression (HI = 0 in the BC<sub>2</sub>mon pool) was low (0.02-0.20% and 0.03-0.29%  
364 depending on whether the *D. flavomontana* or *D. montana* genome was used as a reference), across  
365 the entire genome (Table S6).

366 In contrast, BC<sub>2</sub>fla hybrids showed a significant reduction in mean HI compared to the neutral scenario  
367 (SIM1) for the 4<sup>th</sup> and the X chromosome, and these results were again robust to the choice of reference  
368 genome (*D. flavomontana* genome: Fig. 4, 5B, S4, Table S6; *D. montana* genome: Fig. S5, S6, S7B, Table  
369 S6). Interestingly, and irrespective of which reference genome was used, the reduced introgression on  
370 the 4<sup>th</sup> chromosome could be explained by the reduction in cross-over rate due to inversion present on  
371 this chromosome, without invoking any selection acting on incompatibilities (SIM2) (*D. flavomontana*  
372 genome: Fig. 4, 5C, S4; *D. montana* genome: Fig. S5, S6, S7D). Under this scenario, the mean HI showed  
373 no deviation from the expectation of 12.5% under neutrality but had an increased variance across  
374 simulation replicates.

375 In contrast to the pattern of the chromosome 4, the observed decrease in mean HI of BC<sub>2</sub>fla hybrids on  
376 the X chromosome could not be explained solely by a reduction in cross-over rate due to inversions  
377 (SIM2) (*D. flavomontana* genome: Fig. 4, 5D, S4; *D. montana* genome: Fig. S5, S6, S7F). Instead, our  
378 simulations show that the drastic reduction in mean HI on the X chromosome is compatible with a single  
379 or multiple dominant incompatibility locus/loci residing within the X inversions (SIM3) (*D. flavomontana*  
380 genome: Fig. 4, 5E, S4; *D. montana* genome: Fig. S5, S6, S7G). In other words, the data are consistent  
381 with at least one dominant X chromosomal *D. montana* allele that interacts negatively with autosomal  
382 homozygous recessive *D. flavomontana* alleles. Intriguingly, depending on the reference genome used,  
383 39.4-44.5% of the differentially fixed SNPs between the species on the X chromosome showed no  
384 introgression, emphasising the strength of the X-effect (Table S6). For the autosomes, the fraction of  
385 diagnostic SNPs that showed no introgression into *D. flavomontana* varied from 0.14% to 2.58%,  
386 depending on the chromosome and the choice of reference genome.

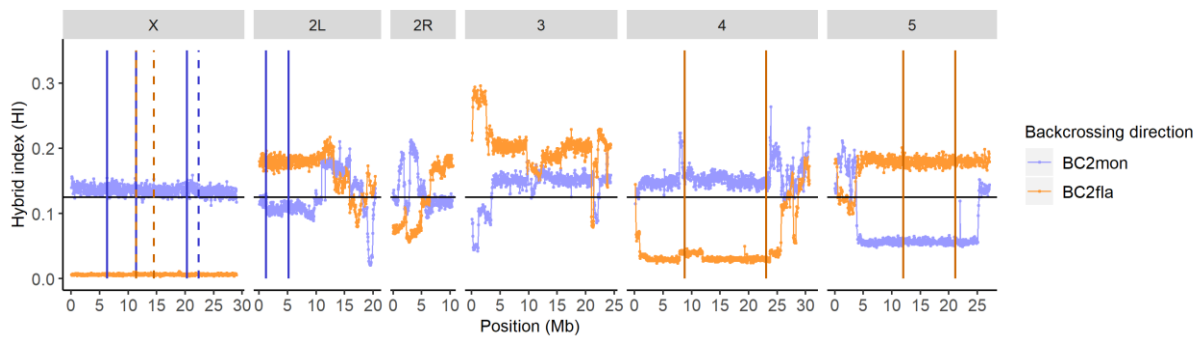

387

388 Figure 4. Observed hybrid index (HI) of 2<sup>nd</sup> backcross generation female pools towards *D. montana* (BC<sub>2smon</sub>) and  
 389 *D. flavomontana* (BC<sub>2fla</sub>) in windows of 400 non-overlapping SNPs along the genome. The data is illustrated using  
 390 the *D. flavomontana* reference genome. For chromosome 2 the left (2L) and right (2R) arms are separated by a  
 391 metacentric centromere. The black horizontal line represents the expected amount of introgression, HI = 12.5 %,  
 392 under neutrality. Vertical lines represent species-specific *D. flavomontana* (yellow) and *D. montana* (blue)  
 393 chromosomal inversions. Solid and dashed vertical lines show breakpoints of different inversions. Corresponding  
 394 data using *D. montana* as the reference genome shown in Fig. S5.

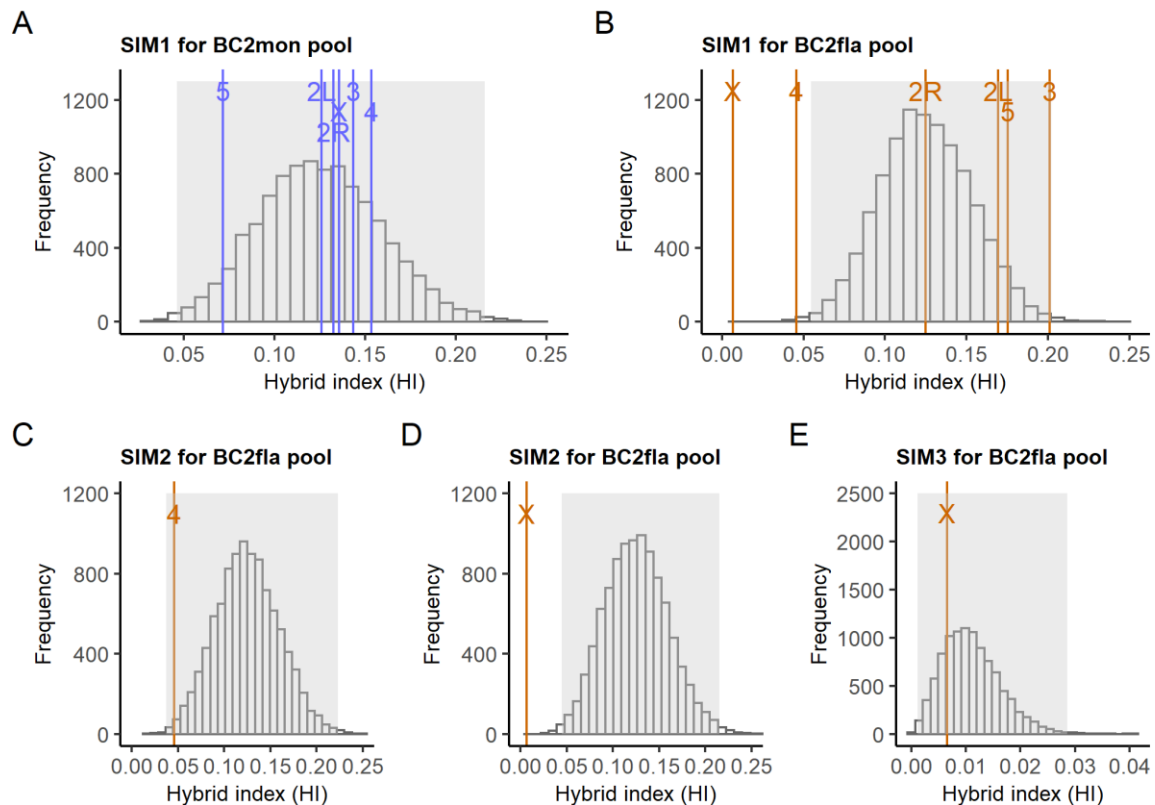

395

396 Figure 5. Hierarchical representation of the most meaningful simulations (10,000 replicates/simulation) of the 2<sup>nd</sup>  
 397 generation backcross experiments towards *D. montana* (BC<sub>2mon</sub>) and *D. flavomontana* (BC<sub>2fla</sub>) (*D. flavomontana*  
 398 was used as a reference genome). The grey area of each figure represents Bonferroni corrected 5% and 95%  
 399 quantiles and the space between them. We consider a mean HI outside of this range statistically different from  
 400 the simulated model. Simulations under neutrality (SIM1) and the observed mean hybrid index (HI) of each  
 401 chromosome for (A) BC<sub>2mon</sub> pool and (B) BC<sub>2fla</sub> pool. Simulations under neutral inversions (SIM2) and observed  
 402 mean HI of BC<sub>2fla</sub> pool for (C) the 4<sup>th</sup> chromosome and (D) the X chromosome. (E) Simulations involving inversions  
 403 with a single locus against introgression (SIM3) and observed mean HI for the X chromosome of BC<sub>2fla</sub> pool.  
 404 Corresponding data using *D. montana* as the reference genome shown in Fig. S7.

405 Chromosome 3 and 5 showed an increased HI in the BC<sub>2</sub>fla pool relative to the neutral expectation of  
406 12.5% (SIM1; Fig. S5-S6; Fig. S7B). However, the interpretation of this finding depends on the choice of  
407 reference genome. Using *D. flavomontana* as a reference genome (which likely underestimates  
408 introgression of *D. montana* alleles into the BC<sub>2</sub>fla pool), the estimated mean HI for the chromosomes  
409 3 and 5 were within the 95<sup>th</sup> percentile for the neutral case (SIM1; Fig. 4; 5B, S4). However, when we  
410 used *D. montana* as a reference genome (which likely overestimates introgression of *D. montana* alleles  
411 into the BC<sub>2</sub>fla pool), BC<sub>2</sub>fla hybrids showed a significant increase in mean HI relative to the neutral  
412 scenario (SIM1) for both chromosomes (Fig. S5, S6, S7B). In this case, we find that the increase in  
413 introgression on the 5<sup>th</sup> chromosome was compatible with a reduction in cross-over rate due to the  
414 inversion present on this chromosome, without invoking any selection acting on incompatibilities (SIM2)  
415 (Fig. S7E). In contrast, the mean estimated HI in BC<sub>2</sub>fla hybrids for chromosome 3 (which has no known  
416 inversion differences between the two species) was not compatible with any of the simple scenarios we  
417 simulated. Given that we have either assumed neutrality or a single dominant incompatibility locus,  
418 which is maximally deleterious, this is perhaps unsurprising (see Discussion).

## 419 Discussion

420 A major theme in speciation research is to understand how the loci inducing genetic incompatibilities  
421 (BDMIs) in interspecific crosses are distributed across the genome, what role chromosomal inversions  
422 and the X chromosome may play in their distribution and what types of epistatic interactions matter for  
423 BDMIs (reviewed in (Coughlan & Matute, 2020; Coyne, 2018; Faria, Johannesson, Butlin, & Westram,  
424 2018; Hoffmann & Rieseberg, 2008)). To shed light on these questions, we performed reciprocal  
425 backcrosses between *D. montana* and *D. flavomontana* and traced the regions of reduced introgression  
426 in 2<sup>nd</sup> backcross generation (BC<sub>2</sub>) females.

### 427 **Postzygotic barriers between *D. montana* and *D. flavomontana* show asymmetry in their strength**

428 We have previously shown that pre- and postzygotic barriers between *D. montana* females and *D.*  
429 *flavomontana* males are practically complete, while both types of barriers between *D. flavomontana*  
430 females and *D. montana* males are weaker (Poikela et al., 2019). In crosses between *D. flavomontana*  
431 females and *D. montana* males, F<sub>1</sub> hybrid males are sterile, but roughly half of the F<sub>1</sub> females are fertile  
432 (Noora Poikela et al., 2019). Accordingly, here we backcrossed fertile F<sub>1</sub> females with the males of both  
433 parental species, and observed a clear asymmetry in the strength of postzygotic barriers between the  
434 two backcross directions. BC<sub>1</sub> hybrid females born from the backcrosses between F<sub>1</sub> females and *D.*  
435 *montana* males showed rather high fertility, and the genetic incompatibilities in BC<sub>2</sub> females had no  
436 detectable effect. In contrast, when backcrossing F<sub>1</sub> hybrid females with *D. flavomontana* males, more  
437 than half of the BC<sub>1</sub> females were sterile, and BC<sub>2</sub> females showed signs of strong BDMIs. This  
438 asymmetry could be a consequence of a history of unidirectional introgression from *D. montana* into *D.*  
439 *flavomontana* in nature (Poikela et al., 2022), if it had induced selection against introgression at certain  
440 loci especially within the X chromosomal inversions, but homogenised genetic divergence on colinear  
441 regions. This kind of pattern in the permeability of species boundaries has been found to contribute to  
442 speciation also in other species (Harrison & Larson, 2014).

443 It is surprising that introgression has not occurred from *D. flavomontana* to *D. montana* in nature, given  
444 that backcrossing towards *D. montana* (BC<sub>2</sub>mon) was relatively successful in this study. The most  
445 obvious reason for this discrepancy is that laboratory experiments may not reveal all reproductive  
446 barriers relevant in wild populations. For example, hybrids may have problems in mate choice in the  
447 wild, or they may face challenges to feed or reproduce on species-specific host trees. Moreover, also  
448 the male hybrids regain fertility in backcross generations (data not shown), which may contribute to  
449 introgression in nature. Finally, BDMIs may well be stronger between *D. montana* and *D. flavomontana*  
450 populations living in close contact.

451 **The role of inversions and the X chromosome in reducing recombination and introgression from *D.***  
452 ***montana* to *D. flavomontana* (BC<sub>2</sub>fla pool)**

453 Inversions have been suggested to contribute to speciation, when three criteria are met: closely related  
454 species must carry alternatively fixed inversions, the inversions suppress recombination, and this  
455 suppression of recombination facilitates reproductive isolation (Faria & Navarro, 2010). *D. montana*  
456 populations on different continents are known to have a high number of fixed and polymorphic  
457 inversions (Morales-hojas, Päällysaho, Vieira, Hoikkala, & Vieira, 2007; Throckmorton, 1982), while  
458 there is less data on *D. flavomontana* inversions (Throckmorton, 1982). Using long- and short-read  
459 genomic data, we have recently identified several alternatively fixed inversions in *D. montana* and *D.*  
460 *flavomontana* across species' distribution in North America, and shown that these inversions have  
461 increased genetic divergence and lower historical introgression compared to colinear chromosome  
462 regions (Poikela et al., 2022). In the present study, we show that these inversions have an increased  
463 number of alternatively fixed SNPs compared to colinear regions, which is in agreement with their  
464 increased genetic divergence shown in Poikela et al. (2022). We have also shown that large swathes of  
465 species-specific ancestry are retained within inverted chromosome regions (Fig. 4), which suggests that  
466 inversions effectively suppress recombination in early backcross hybrids. Finally, we find that the drastic  
467 reduction in introgression on the X chromosome can be explained by inversions that are associated with  
468 at least one dominant X chromosomal *D. montana* incompatibility allele interacting negatively with  
469 recessive autosomal *D. flavomontana* alleles. This negative epistatic interaction could cause the  
470 observed low hybrid fertility, and supports the idea that inversions act as strong barriers to gene flow  
471 by facilitating the establishment of BDMLs (Hoffmann & Rieseberg, 2008; Navarro & Barton, 2003; Noor  
472 et al., 2001).

473 While the involvement of the X chromosome in hybrid problems may not be surprising (see e.g. Masly  
474 & Presgraves, 2007; Tao, Chen, Hartl, & Laurie, 2003), the fact that it involves a dominant incompatibility  
475 locus is. The "dominance theory" (e.g. Turelli & Orr, 1995, 2000), which aims to explain the  
476 disproportionate role of the X chromosome in hybrid incompatibilities, relies on the presence of  
477 recessive incompatibilities on the X and therefore cannot explain our result. However, the "dominance  
478 theory", as well as the "faster-male theory" and dosage compensation (reviewed in Coyne, 2018;  
479 Presgraves, 2008), can still explain the hybrid male sterility previously observed in crosses between *D.*  
480 *flavomontana* and *D. montana* (Poikela et al., 2019). Accumulation of meiotic drive elements on the X  
481 chromosome could be another plausible explanation for the large X-effect in general (reviewed in  
482 Patten, 2018), but this is unlikely in our system as the meiotic drive systems described in *Drosophila* are  
483 typically involved in sperm killing and not in female sterility (Courret et al., 2019). Although cytoplasmic  
484 incompatibilities have been detected in other *montana* complex species of the *Drosophila virilis* group  
485 (Patterson, 1952; Throckmorton, 1982), they are not likely to play a major role in these crosses since all  
486 hybrids had *D. flavomontana* cytoplasm (and crosses were more unsuccessful in this direction). Finally,  
487 the large X-effect we detected in the present study could potentially be explained by "faster X  
488 evolution", based on the idea that selection increases the frequency of advantageous recessive alleles  
489 more effectively on the X chromosome than on autosomes, irrespectively of whether the  
490 incompatibilities themselves are recessive (Charlesworth et al. 1987, 2018). Also, the X chromosome  
491 could simply contain more genes that are prone to create postzygotic isolation than those on the  
492 autosomes (Coyne, 2018).

493 Several autosomes showed deviations from the expected hybrid indices in the BC<sub>2</sub>fla pool. Based on our  
494 simulations, the reduced introgression on the 4<sup>th</sup> chromosome could be explained by inversions' ability  
495 to restrict recombination which increases the variance in chromosome-wide HI. However, if we  
496 calculate the expected allele frequencies for a dominant–recessive BDML by hand for the first two  
497 backcross generations, the allele frequencies (i.e. HI) after selection would be 1/22 (4.5%) for the  
498 dominant and 2/11 (18.2%) for the recessive *D. montana* allele in the BC<sub>2</sub>fla pool (see Fig. S8). These

499 frequencies are close to the observed frequencies e.g. on chromosomes 4 (4.6%) and 5 (17.5%),  
500 respectively. It is therefore tempting to speculate that pairwise BDMI loci could exist on these  
501 chromosomes. Finally, chromosomes 3 and 5 showed increased introgression in the BC<sub>2</sub>fla pool, but  
502 only in analyses using *D. montana* as a reference. This effect may be due to an overestimation of *D.*  
503 *montana* alleles in the BC<sub>2</sub>fla pool (i.e. reference bias). Alternatively, the increased introgression on 5<sup>th</sup>  
504 chromosome could be explained by inversions' ability to restrict recombination, increasing the variance  
505 in chromosome-wide HI. However, the drastic increase in introgression on the 3<sup>rd</sup> chromosome, which  
506 lacks species-specific inversions, was not explained by any of our simulations. We note that our  
507 simulations did not consider an interchromosomal effect, where inversions may trigger an increase in  
508 recombination on other freely recombining chromosomes (Crown et al., 2018; Stevison, Hoehn, & Noor,  
509 2011). However, this would only decrease the variance in HI on chromosomes lacking fixed inversions  
510 and, and thus it cannot explain the increase in HI for chromosome 3 in the BC<sub>2</sub>fla pool.

511 In future research, combining the crosses with quantitative trait loci (QTL) analyses might help to link  
512 BDMIs to e.g. specific genes (Johnson, 2010), gene duplicates or transposons (Bikard et al., 2009; Masly,  
513 Jones, Noor, Locke, & Orr, 2006). BDMI genes could also be searched by tracing whole-genome gene  
514 expression data in interspecific hybrids (Satokangas, Martin, Helanterä, Saramäki, & Kulmuni, 2020).  
515 However, recombination suppression of inversions presents a challenge for mapping BDMIs, and would  
516 in theory require a complex reversion of the X chromosomal inversions with genome editing tools, and  
517 repeating the current experiment to narrow down the regions of reduced introgression (Hopkins,  
518 Tyukmaeva, Gompert, Feder, & Nosil, 2020). Overall, finding the exact loci driving species' isolation may  
519 be difficult, as BDMIs are often complex and co-evolve with rapidly evolving heterochromatic DNA  
520 (Satyaki et al., 2014).

## 521 **Conclusions**

522 "Introgress-and-resequence" studies that combine interspecific backcrosses with genome-wide  
523 analyses and simulations are an effective approach for identifying BDMIs, in particular those involving  
524 dominant alleles. Our study supports the idea that inversions aid the accumulation of BDMIs due to  
525 reduced recombination, and shows that strong BDMIs coupled with suppressed recombination  
526 effectively restrict introgression beyond the inverted part of the genome in the first two backcross  
527 generations. We conclude that the large X-effect we observed in our experiment may result from at  
528 least one dominant incompatibility locus residing within several overlapping inversions. If the design  
529 were extended to study interspecific F<sub>2</sub> hybrids, assuming that the F<sub>1</sub> female and male hybrids are viable  
530 and fertile, one could investigate recessive-recessive BDMIs in the same way. Overall, we provide a novel  
531 framework for investigating the role of inversions and the X chromosome as genetic barriers to  
532 introgression, which we hope will encourage similar studies on a larger number of species and strains.

533 **Acknowledgements**

534 This work was supported by the grants from Academy of Finland project 267244 to AH and projects  
535 268214 and 322980 to MK, as well as a grant from Emil Aaltonen to NP. KL was supported by a Natural  
536 Environmental Research Council (NERC) UK Independent Research fellowship (NE/L011522/1). We  
537 thank Anna-Lotta Hiillos for performing DNA extractions and Ville Hoikkala for his help with data analysis.

538 **Data Accessibility and Benefit-Sharing**

539 Raw reads will be made publicly available in SRA and other data (phenotypic and allele frequency data,  
540 reference genomes for both species, *Mathematica* notebooks including simulations, and Unix and R  
541 commands) in Dryad at the time of publication.

542 **Author Contributions**

543 KL, AH and NP designed the study. NP performed the hybrid backcrosses and analysed the genomic data  
544 with input from KL and DRL. KL performed the simulations. AH and MK supervised and funded the  
545 research. NP, AH and KL drafted the manuscript and all authors finalised it.

546 **Conflict of interest**

547 The authors declare no conflict of interest.

548 **ORCID**

549 Noora Poikela: 0000-0002-4627-9647  
550 Dominik R. Laetsch: 0000-0001-7887-0186  
551 Maaria Kankare: 0000-0003-1541-9050  
552 Anneli Hoikkala: 0000-0001-5407-7992  
553 Konrad Lohse: 0000-0001-9918-058X

554 **Ethics declaration**

555 Neither species is endangered, and the flies were collected along watersides on public lands outside  
556 National and State parks, where insect collecting does not require permits in the USA (The Wilderness  
557 Act of 1964, section 6302.15).



558 **References**

- 559 Abbott, R., Albach, D., Ansell, S., Arntzen, J. W., Baird, S. J. E., Bierne, N., ... Zinner, D. (2013). Hybridization and  
560 speciation. *Journal of Evolutionary Biology*, 26(2), 229–246. doi: 10.1111/j.1420-9101.2012.02599.x
- 561 Anderson, E., & Hubricht, L. (1938). Hybridization in *Tradescantia*. III. The evidence for introgressive  
562 hybridization. *American Journal of Botany*, 25(6), 396–402.
- 563 Bank, C., Bürger, R., & Hermisson, J. (2012). The limits to parapatric speciation: Dobzhansky-Muller  
564 incompatibilities in a continen-island model. *Genetics*, 191, 845–863. doi: 10.1534/genetics.111.137513
- 565 Barbash, D. A., Awadalla, P., & Tarone, A. M. (2004). Functional divergence caused by ancient positive selection  
566 of a *Drosophila* hybrid incompatibility locus. *PLoS Biology*, 2(6), 839–848. doi:  
567 10.1371/journal.pbio.0020142
- 568 Barton, N., & Bengtsson, B. O. (1986). The barrier to genetic exchange between hybridising populations.  
569 *Heredity*, 56, 357–376.
- 570 Bikard, D., Patel, D., Le Metté, C., Giorgi, V., Camilleri, C., Bennett, M. J., & Loudet, O. (2009). Divergent evolution  
571 of duplicate genes leads to genetic incompatibilities within *A. thaliana*. *Science*, 323(5914), 623–626. doi:  
572 10.1126/science.1165917
- 573 Butlin, R. K. (2005). Recombination and speciation. *Molecular Ecology*, 14, 2621–2635. doi: 10.1111/j.1365-  
574 294X.2005.02617.x
- 575 Cattani, M. V., & Presgraves, D. C. (2009). Genetics and lineage-specific evolution of a lethal hybrid  
576 incompatibility between *Drosophila mauritiana* and its sibling species. *Genetics*, 155, 1545–1555. doi:  
577 10.1534/genetics.108.098392
- 578 Charlesworth, B., Campos, J. L., & Jackson, B. C. (2018). Faster-X evolution: theory and evidence from *Drosophila*.  
579 *Molecular Ecology*, 27(19), 3753–3771. doi: 10.1111/mec.14534
- 580 Charlesworth, B., Coyne, J. A., & Barton, N. H. (1987). The relative rates of evolution of sex chromosomes and  
581 autosomes. *The American Naturalist*, 130(1), 113–146.
- 582 Chen, S., Zhou, Y., Chen, Y., & Gu, J. (2018). Fastp: An ultra-fast all-in-one FASTQ preprocessor. *Bioinformatics*,  
583 34(17), i884–i890. doi: 10.1093/bioinformatics/bty560
- 584 Coughlan, J. M., & Matute, D. R. (2020). The importance of intrinsic postzygotic barriers throughout the  
585 speciation process. *Philosophical Transactions of the Royal Society B*, 375(1806), 20190533.
- 586 Courret, C., Chang, C. H., Wei, K. H. C., Montchamp-Moreau, C., & Larracuente, A. M. (2019). Meiotic drive  
587 mechanisms: lessons from *Drosophila*. *Proceedings of the Royal Society B: Biological Sciences*, 286(1913),  
588 20191430. doi: 10.1098/rspb.2019.1430
- 589 Coyne, J. A. (2018). “Two rules of speciation” revisited. *Molecular Ecology*, 27(19), 3749–3752. doi:  
590 10.1111/mec.14790
- 591 Coyne, J. A., & Orr, A. H. (2004). Speciation. In M. Sinauer Associates, Sunderland (Ed.), *Sunderland, MA: Sinauer*  
592 *Associates*.
- 593 Crespi, B., & Nosil, P. (2013). Conflictual speciation: species formation via genomic conflict. *Trends in Ecology and*  
594 *Evolution*, 28(1), 48–57. doi: 10.1016/j.tree.2012.08.015
- 595 Crown, K. N., Miller, D. E., Sekelsky, J., & Hawley, R. S. (2018). Local inversion heterozygosity alters  
596 recombination throughout the genome. *Current Biology*, 28, 2984–2990. doi: 10.1016/j.cub.2018.07.004
- 597 Dobzhansky, T. (1940). Speciation as a stage in evolutionary divergence. *The American Naturalist*, 74(753), 312–  
598 321. doi: 10.1086/285850
- 599 Faria, R., Johannesson, K., Butlin, R. K., & Westram, A. M. (2018). Evolving Inversions. *Trends in Ecology &*  
600 *Evolution*, 1–10. doi: 10.1016/j.tree.2018.12.005
- 601 Faria, R., & Navarro, A. (2010). Chromosomal speciation revisited: rearranging theory with pieces of evidence.  
602 *Trends in Ecology & Evolution*, 25(11), 660–669. doi: 10.1016/j.tree.2010.07.008
- 603 Felsenstein, J. (1981). Skepticism towards santa rosalia, or why are there so few kinds of animals? *Evolution*,  
604 35(1), 124–138.
- 605 Fisher, R. A. (1954). A fuller theory of “junctions” in inbreeding. *Heredity*, 8(2), 187–197.
- 606 Fishman, L., Stathos, A., Beardsley, P. M., Williams, C. F., & Hill, J. P. (2013). Chromosomal rearrangements and  
607 the genetics of reproductive barriers in *Mimulus* (monkeyflowers). *Evolution*, 67(9), 2547–2560. doi:  
608 10.1111/evo.12154
- 609 Gompert, Z., Lucas, L. K., Nice, C. C., & Buerkle, C. A. (2012). Genome divergence and the genetic architecture of  
610 barriers to gene flow between *Lycaeides idas* and *L. melissa*. *Evolution*, 67(9), 2498–2514. doi:  
611 10.1111/evo.12021

- 612 Haldane, J. B. S. (1922). Sex ratio and unisexual sterility in hybrid animals. *Journal of Genetics*, 12(2), 101–109.
- 613 Harrison, R. G., & Larson, E. L. (2014). Hybridization, introgression, and the nature of species boundaries. *Journal*  
614 *of Heredity*, 105(S1), 795–809. doi: 10.1093/jhered/esu033
- 615 Hoffmann, A. A., & Rieseberg, L. H. (2008). The of impact revisiting in evolution: inversions from genetic  
616 population markers to drivers of adaptive shifts and speciation? *Annual Review of Ecology, Evolution, and*  
617 *Systematics*, 39, 21–42.
- 618 Hoikkala, A., & Poikela, N. (2022). Adaptation and ecological speciation in seasonally varying environments at  
619 high latitudes: *Drosophila virilis* group . *Fly*, 16(1), 85–104. doi: 10.1080/19336934.2021.2016327
- 620 Hopkins, D. P., Tyukmaeva, V. I., Gompert, Z., Feder, J., & Nosil, P. (2020). Functional genomics offers new tests  
621 of speciation hypotheses. *Trends in Ecology and Evolution*, 35(11), 968–971. doi:  
622 10.1016/j.tree.2020.08.001
- 623 Johnson, N. A. (2010). Hybrid incompatibility genes: remnants of a genomic battlefield? *Trends in Genetics*,  
624 26(7), 317–325. doi: 10.1016/j.tig.2010.04.005
- 625 Kapun, M., Barron, M. G., Staubach, F., Obbard, D. J., Axel, R., Vieira, J., ... Gonzalez, J. (2020). Genomic analysis  
626 of european *Drosophila melanogaster* populations reveals longitudinal structure, continent-wide selection,  
627 and previously unknown DNA viruses. *Molecular Biology and Evolution*, 37(9), 2661–2678. doi:  
628 10.1093/molbev/msaa120
- 629 Khadem, M., Camacho, R., & Nóbrega, C. (2011). Studies of the species barrier between *Drosophila subobscura*  
630 and *D. madeirensis* V: the importance of sex-linked inversion in preserving species identity. *Journal of*  
631 *Evolutionary Biology*, 24, 1263–1273. doi: 10.1111/j.1420-9101.2011.02263.x
- 632 Kirkpatrick, M., & Barton, N. (2006). Chromosome inversions, local adaptation and speciation. *Genetics*,  
633 434(May), 419–434. doi: 10.1534/genetics.105.047985
- 634 Korunes, K. L., & Noor, M. A. F. (2018). Pervasive gene conversion in chromosomal inversion heterozygotes.  
635 *Molecular Ecology*, 1–14. doi: 10.1111/mec.14921
- 636 Lewontin, R. C., & Birch, L. C. (1966). Hybridization as a source of variation for adaptation to new environments.  
637 *Evolution*, 20(3), 315. doi: 10.2307/2406633
- 638 Li, H., & Durbin, R. (2009). Fast and accurate short read alignment with Burrows – Wheeler transform.  
639 *Bioinformatics*, 25(14), 1754–1760. doi: 10.1093/bioinformatics/btp324
- 640 Li, H., Handsaker, B., Wysoker, A., Fennell, T., Ruan, J., Homer, N., ... Durbin, R. (2009). The Sequence Alignment /  
641 Map (SAM) Format and SAMtools. *Bioinformatics*, 25, 2078–2079.
- 642 Masly, J. P., Jones, C. D., Noor, M. A. F., Locke, J., & Orr, H. A. (2006). Gene transposition as a cause of hybrid  
643 sterility in *Drosophila*. *Science*, 313(5792), 1448–1450. doi: 10.1126/science.1128721
- 644 Masly, J. P., & Presgraves, D. C. (2007). High-resolution genome-wide dissection of the two rules of speciation in  
645 *Drosophila*. *PLoS Biology*, 5(9), e243. doi: 10.1371/journal.pbio.0050243
- 646 Mcgaugh, S. E., & Noor, M. A. F. (2012). Genomic impacts of chromosomal inversions in parapatric *Drosophila*  
647 species. *Philosophical Transactions of the Royal Society B*, 367, 422–429. doi: 10.1098/rstb.2011.0250
- 648 Morales-hojas, R., Päällysaho, S., Vieira, C. P., Hoikkala, A., & Vieira, J. (2007). Comparative polytene  
649 chromosome maps of *D. montana*. *Chromosoma*, 116, 21–27. doi: 10.1007/s00412-006-0075-3
- 650 Navarro, A., & Barton, N. H. (2003). Accumulating postzygotic isolation genes in parapatry: a new twist on  
651 chromosomal speciation. *Evolution*, 57(3), 447–459.
- 652 Navarro, A., Betrán, E., Barbadilla, A., & Ruiz, A. (1997). Recombination and gene flux caused by gene conversion  
653 and crossing over in inversion heterokaryotypes. *Genetics*, 146, 695–709.
- 654 Noor, M. A. F., Grams, K. L., Bertucci, L. A., & Reiland, J. (2001). Chromosomal inversions and the reproductive  
655 isolation of species. *Proceedings of the National Academy of Sciences of the United States of America*,  
656 98(21), 12084–12088. doi: 10.1073/pnas.221274498
- 657 Nosil, P., & Feder, J. L. (2012). Genomic divergence during speciation: causes and consequences. *Philosophical*  
658 *Transactions of the Royal Society B: Biological Sciences*, 367(1587), 332–342. doi: 10.1098/rstb.2011.0263
- 659 Orr, H. A. (1995). The population genetics of speciation: the evolution of hybrid incompatibilities. *Genetics*, 139,  
660 1805–1813.
- 661 Orr, H. A. (1997). Haldane’s rule. *Annual Review of Ecology and Systematics*, 28(1), 195–218.
- 662 Päällysaho, S., Aspi, J., Liimatainen, J. O., & Hoikkala, A. (2003). Role of X chromosomal song genes in the  
663 evolution of species-specific courtship songs in *Drosophila virilis* group species. *Behavior Genetics*, 33(1),  
664 25–32. doi: 10.1023/A:1021047415921
- 665 Patterson, J. T. (1952). Revision of the *montana* complex of the *virilis* species group. *The Univeristy of Texas*  
666 *Publication*, 5204, 20–34.

- 667 Poikela, N, Laetsch, D. R., Lohse, K., & Kankare, M. (2022). Ancestrally polymorphic chromosomal inversions as  
668 potential drivers of speciation. *BioRxiv*, 1–24. <https://doi.org/10.1101/2022.11.15.516589>
- 669 Poikela, Noora, Kinnunen, J., Wurdack, M., Kauranen, H., Schmitt, T., Kankare, M., ... Hoikkala, A. (2019). Strength  
670 of sexual and postmating prezygotic barriers varies between sympatric populations with different histories  
671 and species abundances. *Evolution*, 73(6), 1182–1199. doi: 10.1111/evo.13732
- 672 Presgraves, D. C. (2010a). Speciation genetics: search for the missing snowball. *Current Biology*, 20(24), R1073–  
673 R1074. doi: 10.1016/j.cub.2010.10.056
- 674 Presgraves, D. C. (2010b). The molecular evolutionary basis of species formation. *Nature Reviews Genetics*, 11(3),  
675 175–180. doi: 10.1038/nrg2718
- 676 Rausch, T., Zichner, T., Schlattl, A., Stütz, A. M., Benes, V., & Korbel, J. O. (2012). DELLY: structural variant  
677 discovery by integrated paired-end and split-read analysis. *Bioinformatics*, 28, 333–339. doi:  
678 10.1093/bioinformatics/bts378
- 679 Ravinet, M., Faria, R., Butlin, R. K., Galindo, J., Bierne, N., Rafajlovic, M., ... Westram, A, M. (2017). Interpreting  
680 the genomic landscape of speciation: a road map for finding barriers to gene flow. *Journal of Evolutionary  
681 Biology*, 30, 1450–1477. doi: 10.1111/jeb.13047
- 682 Rieseberg, L. H. (2001). Chromosomal rearrangements and speciation. *Trends in Ecology & Evolution*, 16(7), 351–  
683 358.
- 684 Salminen, T. S., & Hoikkala, A. (2013). Effect of temperature on the duration of sensitive period and on the  
685 number of photoperiodic cycles required for the induction of reproductive diapause in *Drosophila  
686 montana*. *Journal of Insect Physiology*, 59(4), 450–457. doi: 10.1016/j.jinsphys.2013.02.005
- 687 Satokangas, I., Martin, S. H., Helanterä, H., Saramäki, J., & Kulmuni, J. (2020). Multi-locus interactions and the  
688 build-up of reproductive isolation. *Philosophical Transactions of the Royal Society B*, 375(1806), 20190543.
- 689 Satyaki, P. R. V., Cuykendall, T. N., Wei, K. H. C., Brideau, N. J., Kwak, H., Aruna, S., ... Barbash, D. A. (2014). The  
690 Hmr and Lhr hybrid incompatibility genes suppress a broad range of heterochromatic repeats. *PLoS  
691 Genetics*, 10(3), e1004240. doi: 10.1371/journal.pgen.1004240
- 692 Servedio, M. R., & Noor, M. A. F. (2003). The role of reinforcement in speciation: theory and data. *Annual Review  
693 of Ecology, Evolution, and Systematics*, 34, 339–364. doi: 10.1146/132412
- 694 Stevison, L. S., Hoehn, K. B., & Noor, M. A. F. (2011). Effects of inversions on within- and between-species  
695 recombination and divergence. *Genome Biology and Evolution*, 3, 830–841. doi: 10.1093/gbe/evr081
- 696 Sturtevant, A. H. (1921). A case of rearrangement of genes in *Drosophila*. *Proceedings of the National Academy  
697 of Sciences of the United States of America*, 7(8), 235–237.
- 698 Sturtevant, A. H., & Beadle, G. W. (1936). The relations of inversions in the X chromosome of *Drosophila  
699 melanogaster* to crossing over and disjunction. *Genetics*, 21, 554–604.
- 700 Tang, S., & Presgraves, D. C. (2009). Evolution of the *Drosophila* nuclear pore complex results in multiple hybrid  
701 incompatibilities. *Science*, 323(5915), 779–782.
- 702 Tao, Y., Chen, S., Hartl, D. L., & Laurie, C. C. (2003). Genetic dissection of hybrid incompatibilities between  
703 *Drosophila simulans* and *D. mauritiana*. I. Differential accumulation of hybrid male sterility effects on the X  
704 and autosomes. *Genetics*, 164, 1383–1397.
- 705 Tarasov, A., Vilella, A. J., Cuppen, E., Nijman, I. J., & Prins, P. (2015). Sambamba: fast processing of NGS alignment  
706 formats. *Bioinformatics*, 31(12), 2032–2034. doi: 10.5281/zenodo.13200.Contact
- 707 Thorvaldsdóttir, H., Robinson, J. T., & Mesirov, J. P. (2012). Integrative Genomics Viewer (IGV): high-performance  
708 genomics data visualization and exploration. *Briefings in Bioinformatics*, 14(2), 178–192. doi:  
709 10.1093/bib/bbs017
- 710 Throckmorton, L. H. (1982). The *virilis* species group. *The Genetics and Bioogy of Drosophila*, 3, 227–296.
- 711 Turelli, M., & Moyle, L. C. (2007). Asymmetric postmating isolation: Darwin’s corollary to Haldane’s rule.  
712 *Genetics*, 176, 1059–1088. doi: 10.1534/genetics.106.065979
- 713 Turelli, M., & Orr, H. A. (1995). The dominance theory of Haldane’s rule. *Genetics*, 140(1), 389–402.
- 714 Turelli, M., & Orr, H. A. (2000). Dominance, epistasis and the genetics of postzygotic isolation. *Genetics*, 154(4),  
715 1663–1679.
- 716 Wu, C. I. (2001). The genic view of the process of speciation. *Journal of Evolutionary Biology*, Vol. 14, pp. 851–  
717 865. doi: 10.1046/j.1420-9101.2001.00335.x
- 718
